# Supplementary material for: Synthesis of macrocyclic peptidomimetics via the Ugi-click-strategy
Source: Royal Society of Chemistry journal article supplement (doi:10.1039/c9ob00229d), 2019-01-01

## Supporting information for

### The Synthesis of macrocyclic peptidomimetics via Ugi/click-strategy

E. A. Zakharova,<sup>a</sup> O. I. Shmatova,<sup>a</sup> I. V. Kutovaya,<sup>a</sup> Victor N. Khrustalev<sup>b,c</sup> and  
V. G. Nenajdenko<sup>a</sup>

<sup>a</sup> Department of Chemistry, Lomonosov Moscow State University, Moscow, 119991, Russia;

<sup>b</sup> Peoples' Friendship University of Russia, 6 Miklukho-Maklay Street, Moscow 117198, Russia;

<sup>c</sup> A.N. Nesmeyanov Institute of Organoelement Compounds, Russian Academy of Sciences, 28 Vavilov Street, Moscow 119991, Russia

| <b>Contents</b>                                  | <b>Page</b> |
|--------------------------------------------------|-------------|
| <b>Crystal Structure Details for Compound 5o</b> | <b>S2</b>   |
| <b>NMR spectra</b>                               | <b>S4</b>   |

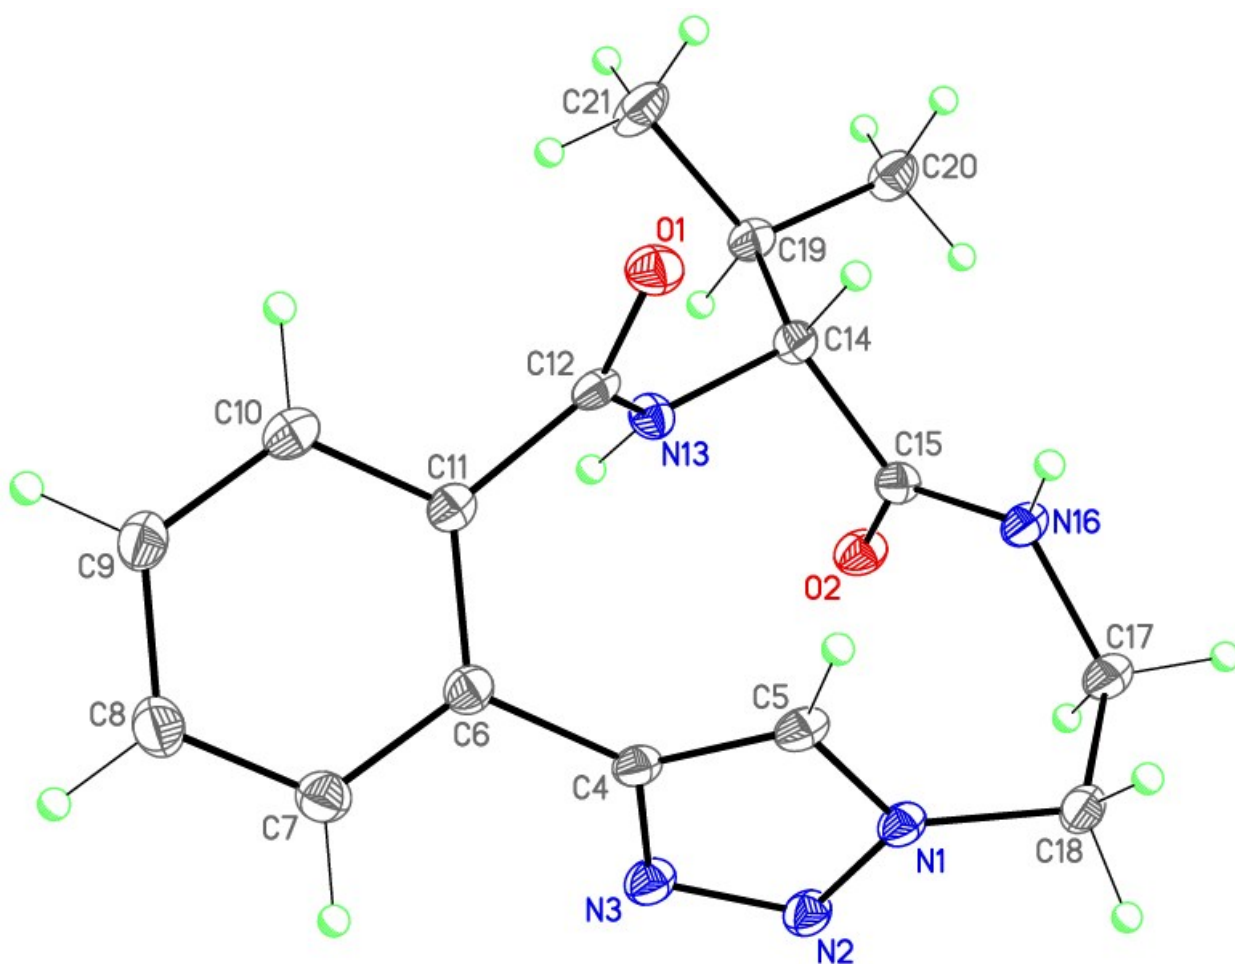

**Figure S1. Structure of compound 5o. Anisotropic displacement ellipsoids show 50% probability levels. Hydrogen atoms are drawn as circles with small radii.**

|                                 |                                                               |                 |
|---------------------------------|---------------------------------------------------------------|-----------------|
| Identification code             | <b>5o</b>                                                     |                 |
| Empirical formula               | C <sub>16</sub> H <sub>19</sub> N <sub>5</sub> O <sub>2</sub> |                 |
| Formula weight                  | 313.36                                                        |                 |
| Temperature                     | 100(2) K                                                      |                 |
| Wavelength                      | 0.96990 Å                                                     |                 |
| Crystal system                  | Monoclinic                                                    |                 |
| Space group                     | P2 <sub>1</sub> /c                                            |                 |
| Unit cell dimensions            | a = 8.9287(18) Å                                              | ∠ = 90°.        |
|                                 | b = 19.324(4) Å                                               | ∠ = 110.58(3)°. |
|                                 | c = 9.833(2) Å                                                | ∠ = 90°.        |
| Volume                          | 1588.3(6) Å <sup>3</sup>                                      |                 |
| Z                               | 4                                                             |                 |
| Density (calculated)            | 1.311 Mg/m <sup>3</sup>                                       |                 |
| Absorption coefficient          | 0.189 mm <sup>-1</sup>                                        |                 |
| F(000)                          | 664                                                           |                 |
| Crystal size                    | 0.20 x 0.03 x 0.02 mm <sup>3</sup>                            |                 |
| Theta range for data collection | 3.345 to 38.446°.                                             |                 |

|                                               |                                             |
|-----------------------------------------------|---------------------------------------------|
| Index ranges                                  | -11<=h<=7, -22<=k<=22, -11<=l<=12           |
| Reflections collected                         | 10660                                       |
| Independent reflections                       | 3285 [R(int) = 0.0886]                      |
| Completeness to theta = 35.587°               | 98.1 %                                      |
| Absorption correction                         | Semi-empirical from equivalents             |
| Max. and min. transmission                    | 0.987 and 0.960                             |
| Refinement method                             | Full-matrix least-squares on F <sup>2</sup> |
| Data / restraints / parameters                | 3285 / 0 / 211                              |
| Goodness-of-fit on F <sup>2</sup>             | 0.959                                       |
| Final R indices [for 2152 rflns with I>2σ(I)] | R1 = 0.0825, wR2 = 0.1707                   |
| R indices (all data)                          | R1 = 0.1099, wR2 = 0.1881                   |
| Extinction coefficient                        | 0.042(4)                                    |
| Largest diff. peak and hole                   | 0.342 and -0.367 e.Å <sup>-3</sup>          |

**Table S1.** Hydrogen bonds for **5o** [Å and °].

| D-H...A               | d(D-H) | d(H...A) | d(D...A) | <(DHA) |
|-----------------------|--------|----------|----------|--------|
| C(5)-H(5)...O(2)#1    | 0.95   | 2.42     | 3.150(2) | 134    |
| N(13)-H(13)...O(1)#2  | 0.91   | 1.94     | 2.846(2) | 176    |
| N(16)-H(16)...N(3)#1  | 0.91   | 2.09     | 2.982(3) | 165    |
| C(18)-H(18A)...O(1)#3 | 0.99   | 2.50     | 3.483(2) | 170    |
| C(18)-H(18B)...N(2)#1 | 0.99   | 2.52     | 3.362(3) | 143    |

Symmetry transformations used to generate equivalent atoms:

#1 x, -y+3/2, z-1/2 #2 x, -y+3/2, z+1/2 #3 x-1, y, z

### 3c (unstable compound, easily decomposes)

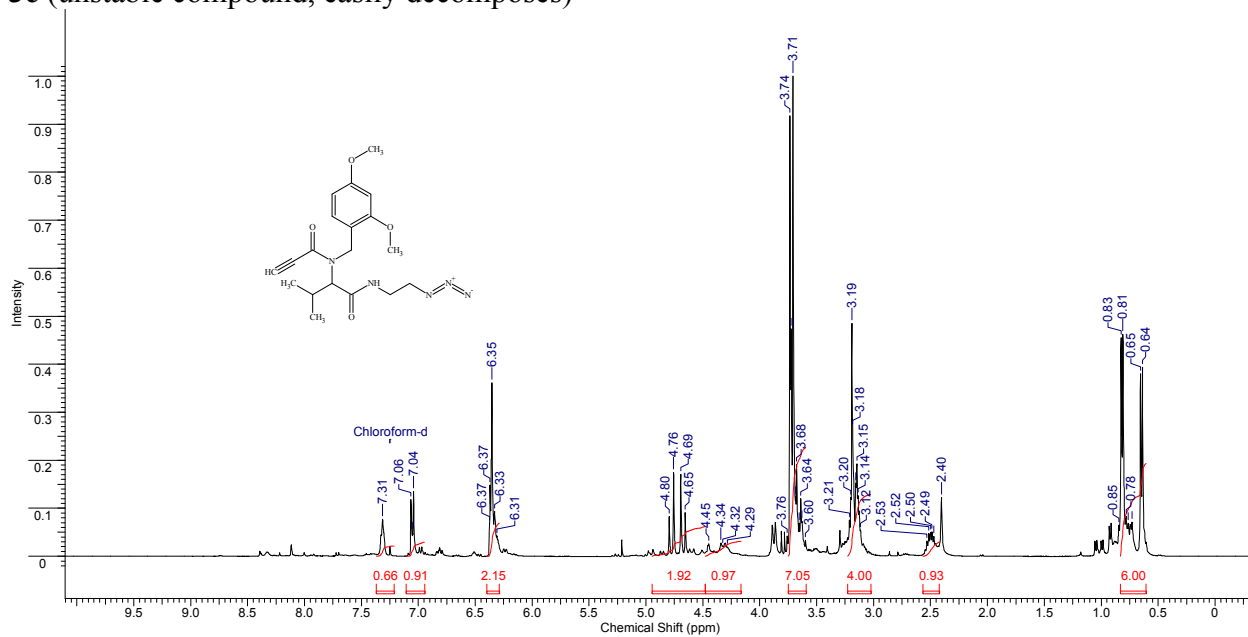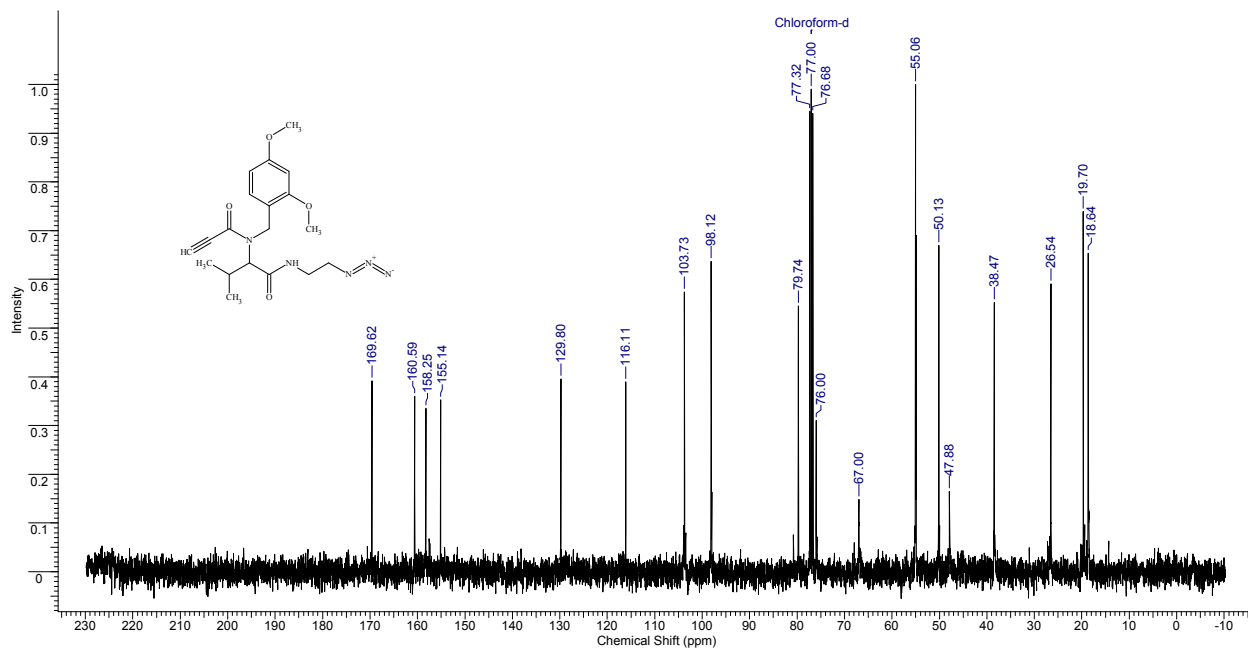

two rotamers in ratio 5:1

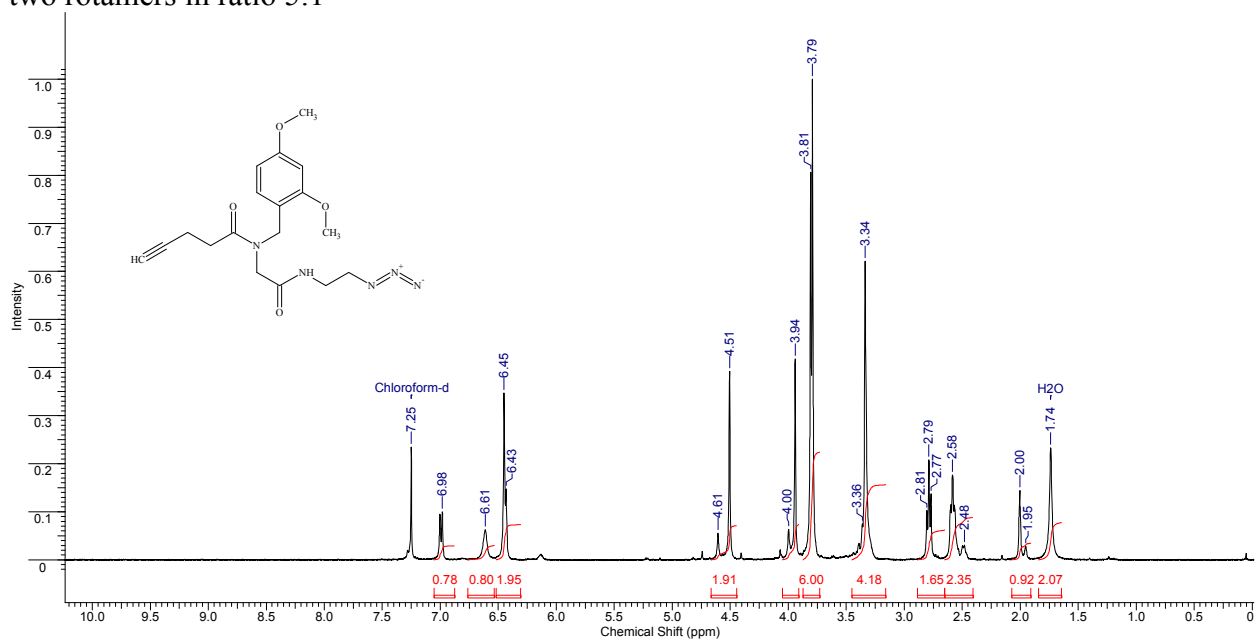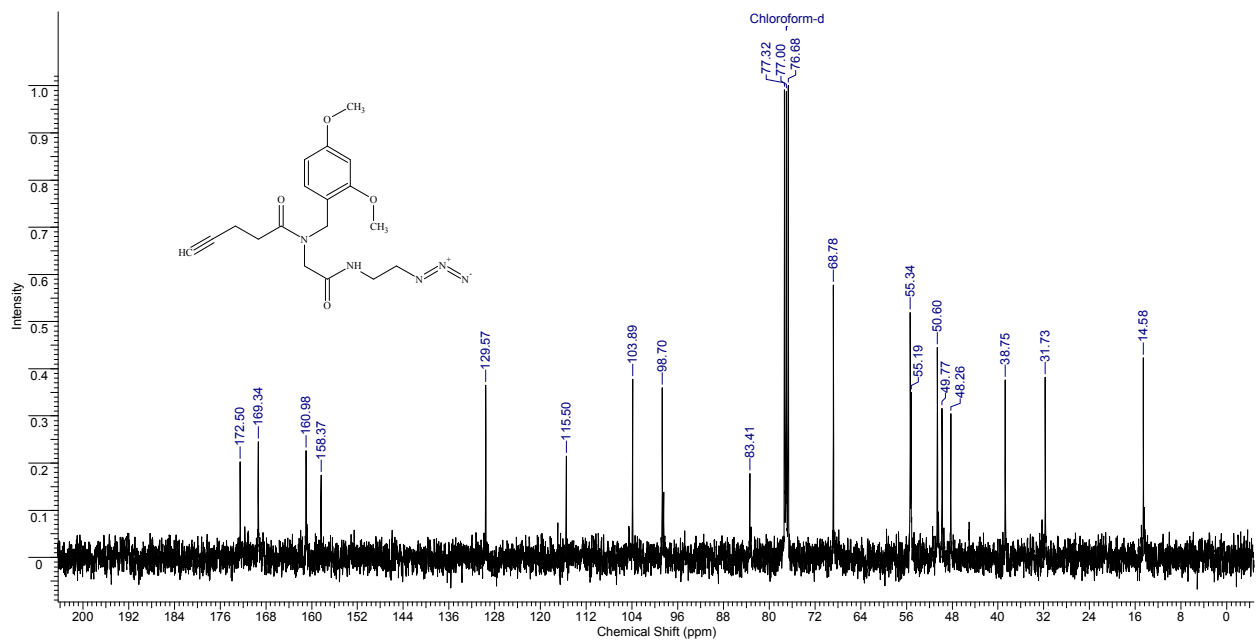

3e

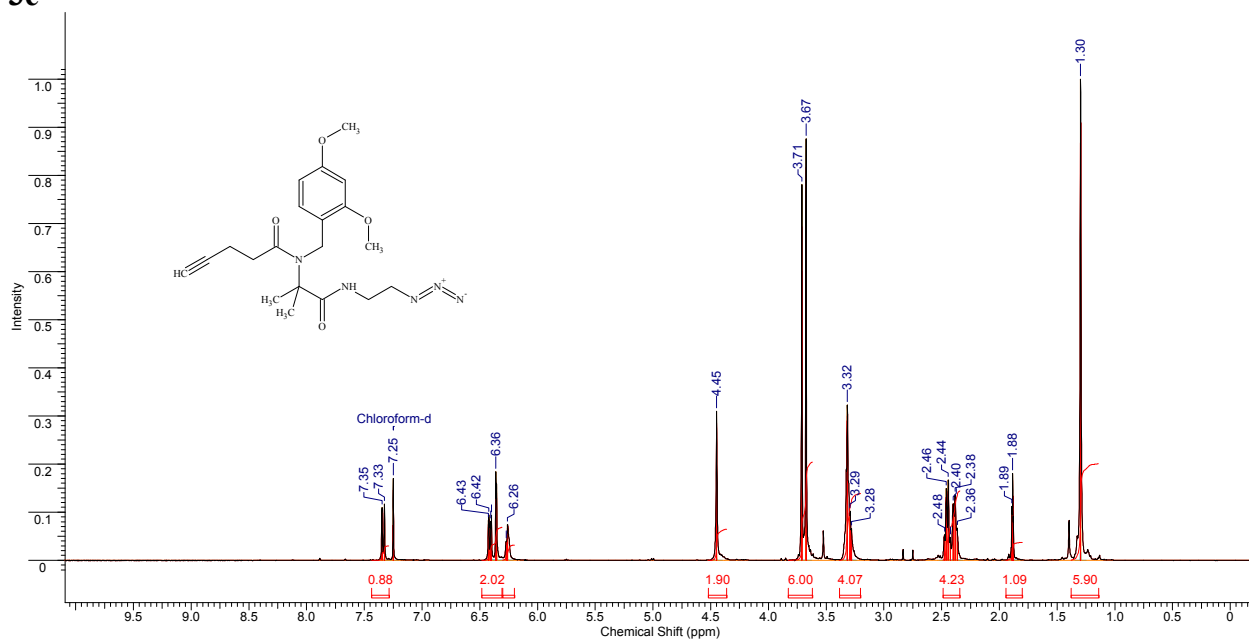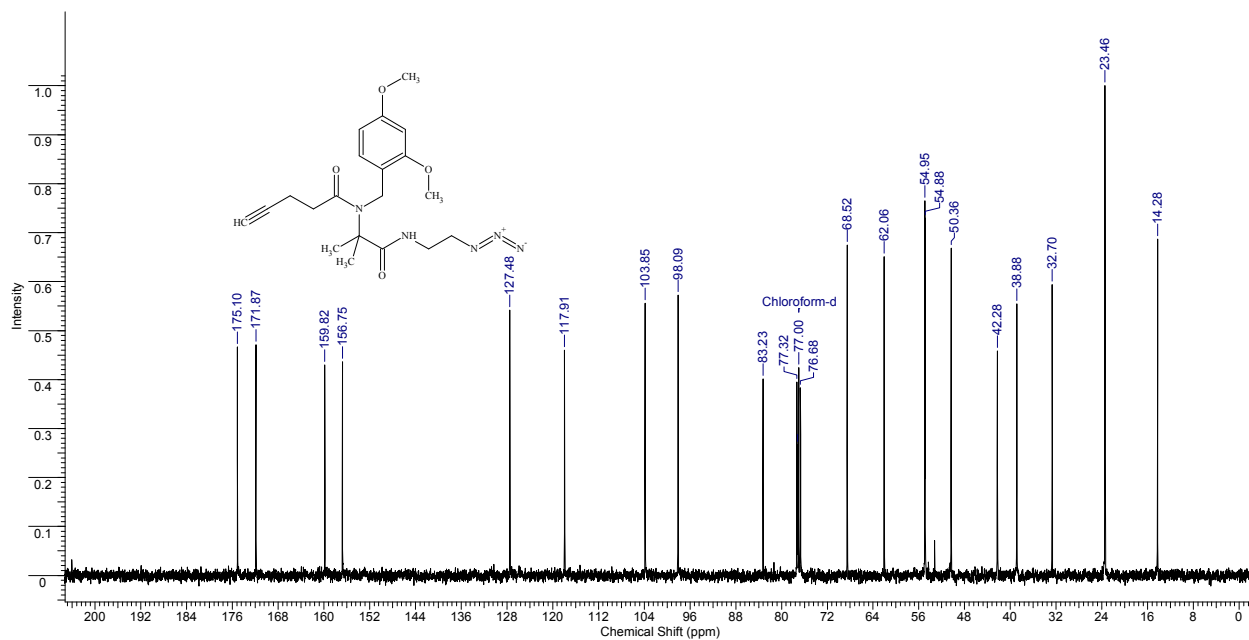

3f

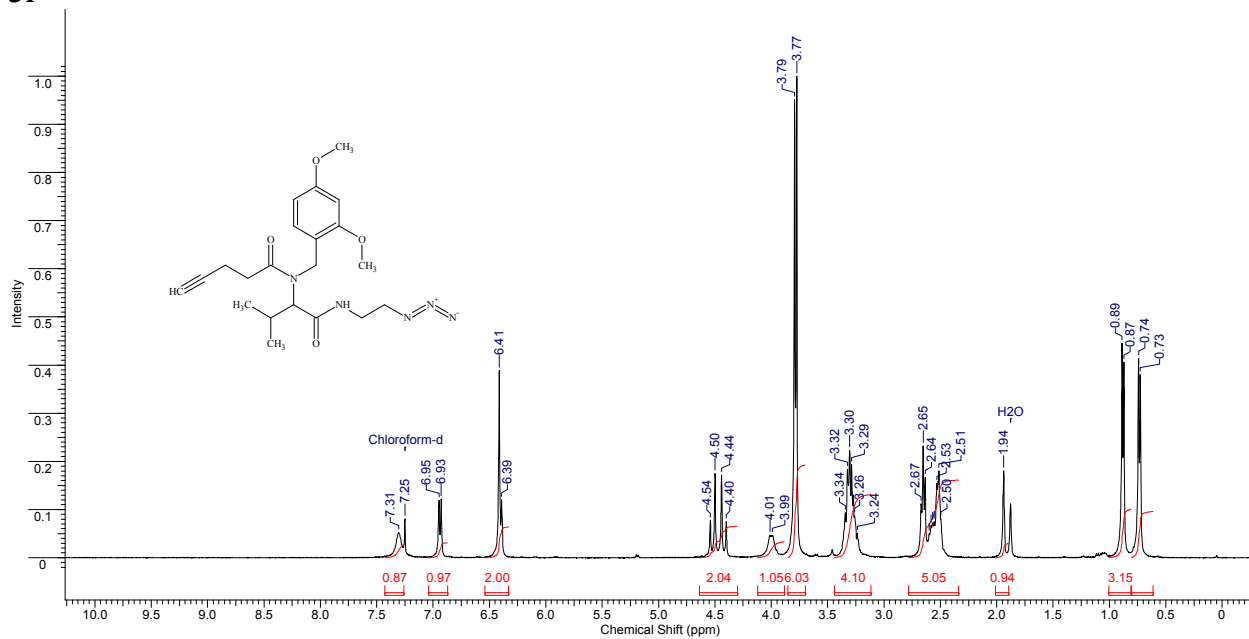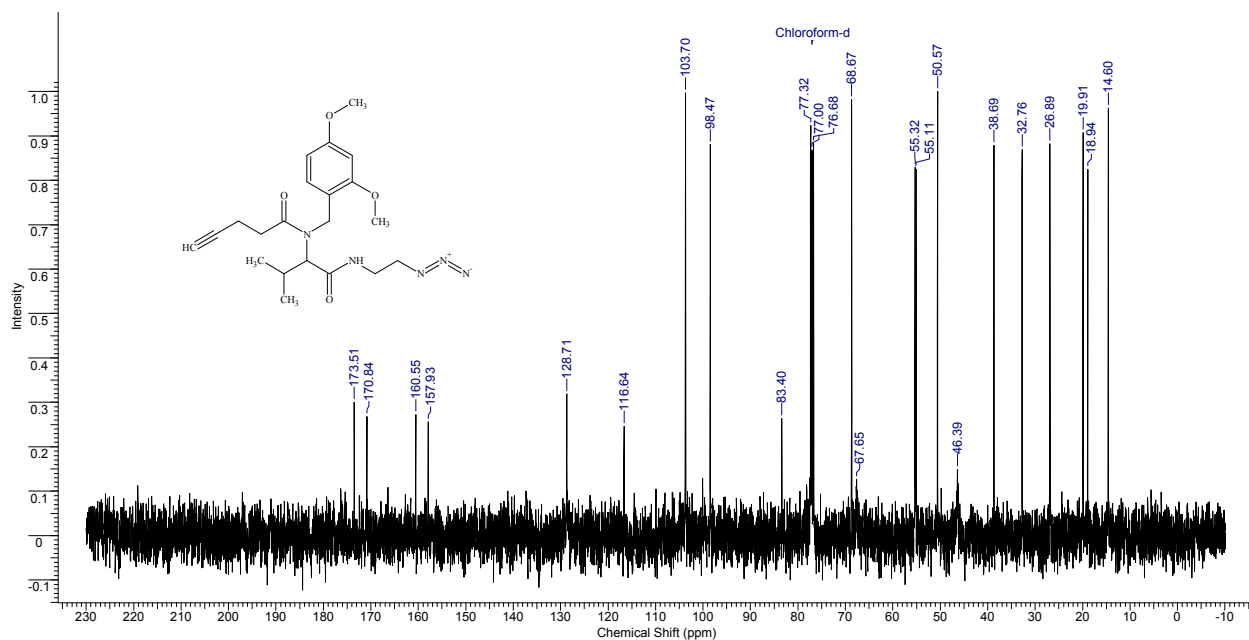

**3g** (two rotamers in ratio 5:1)

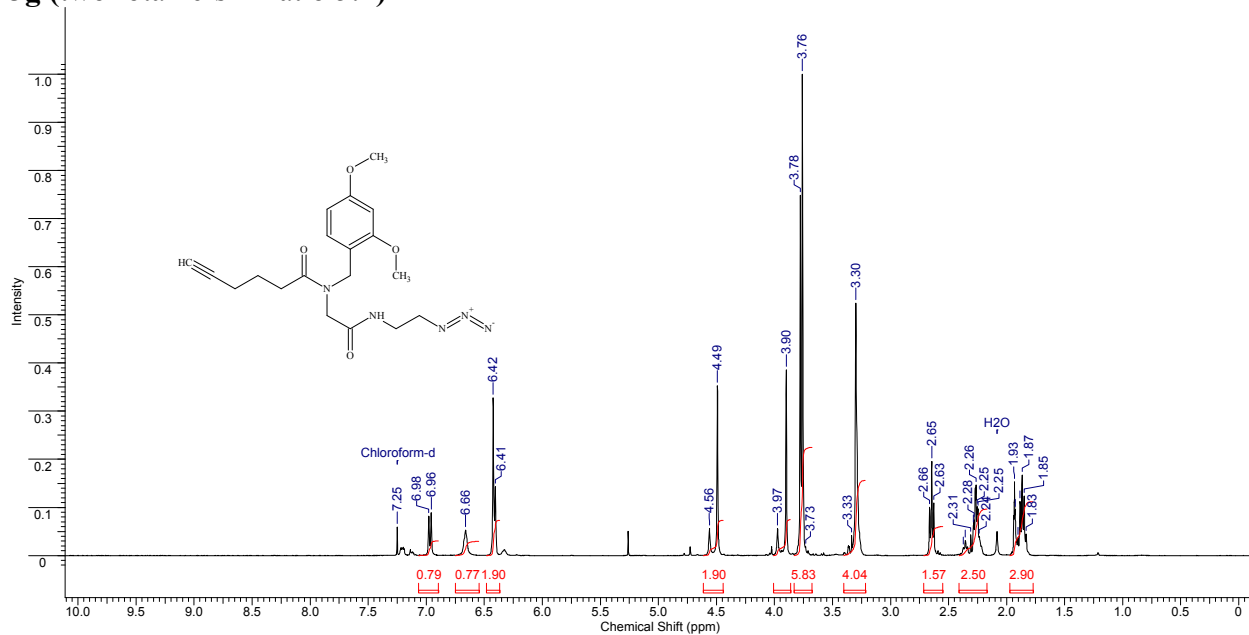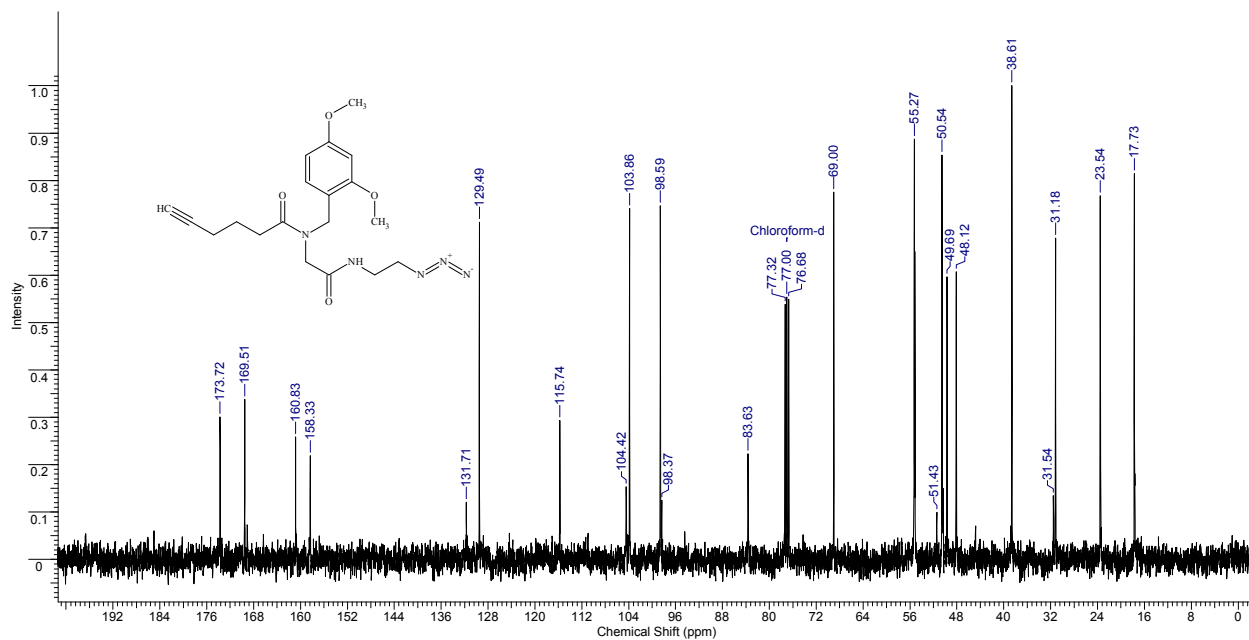



3h

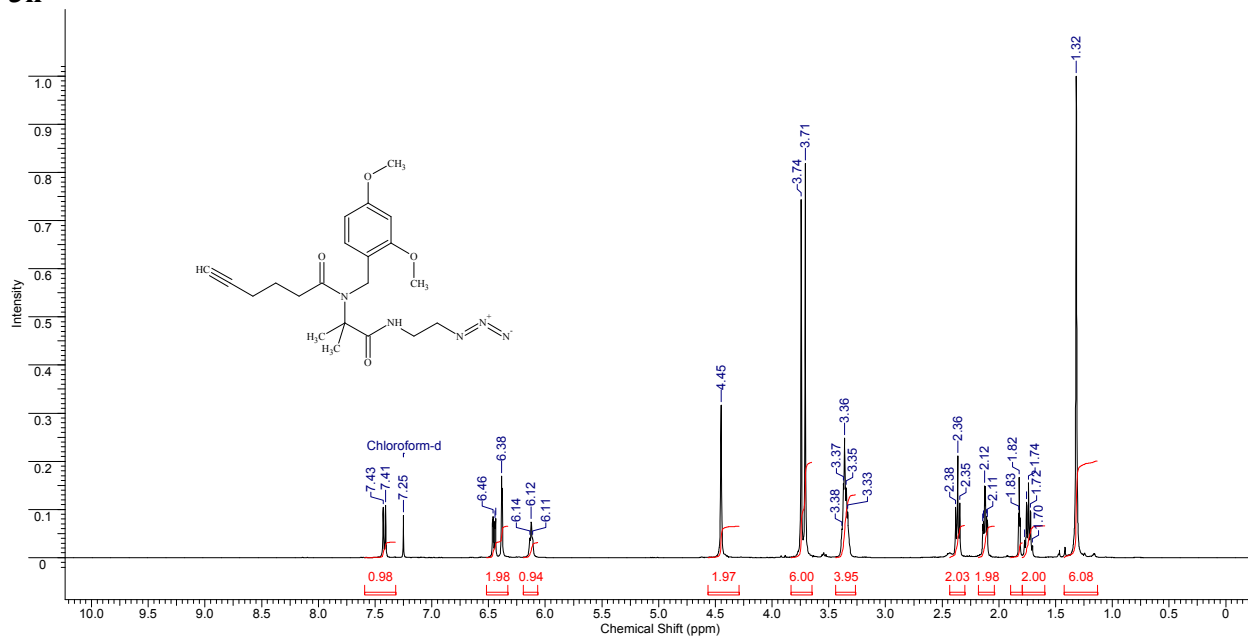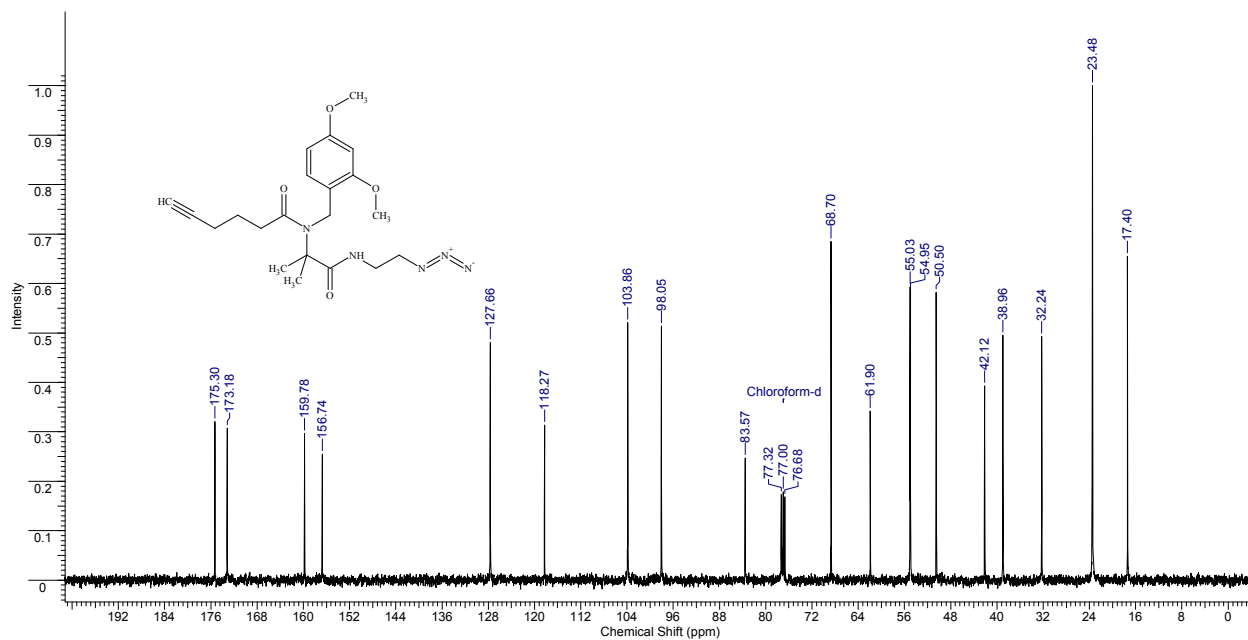

3i

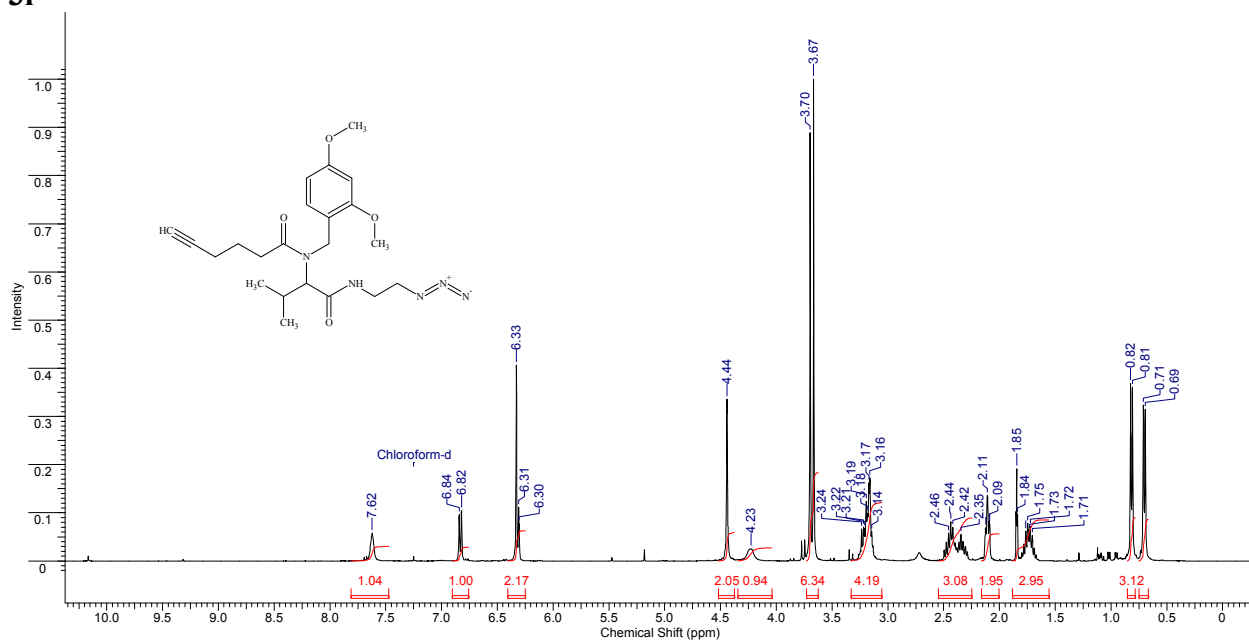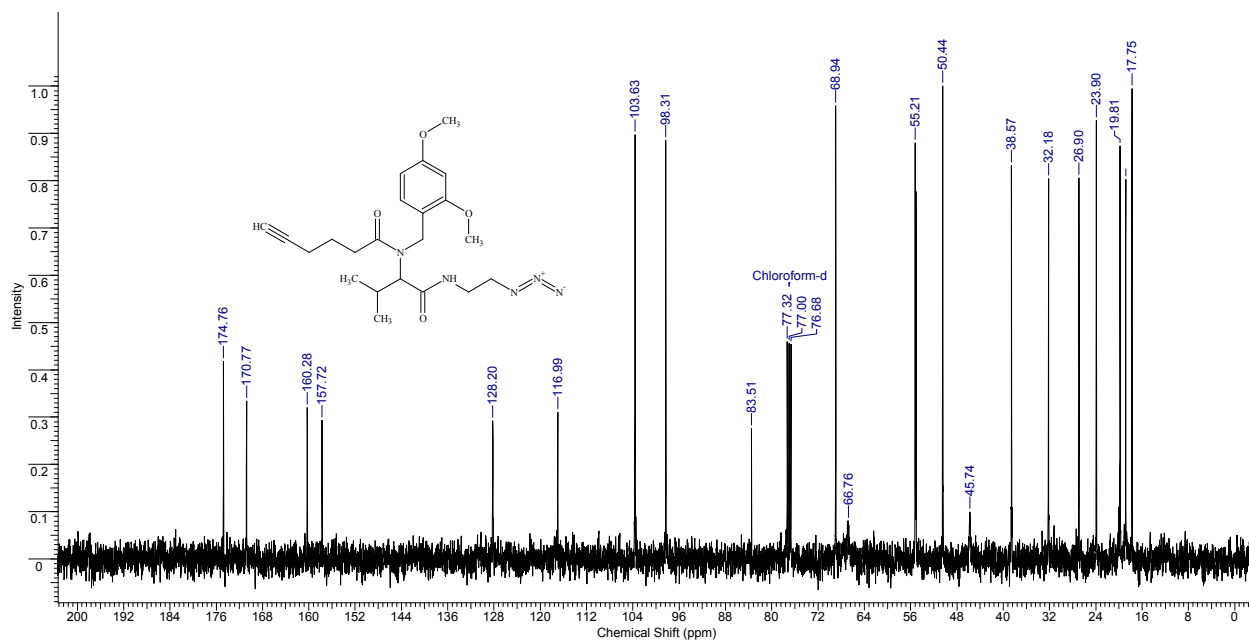

**3j** (two rotamers in ratio 4:1)

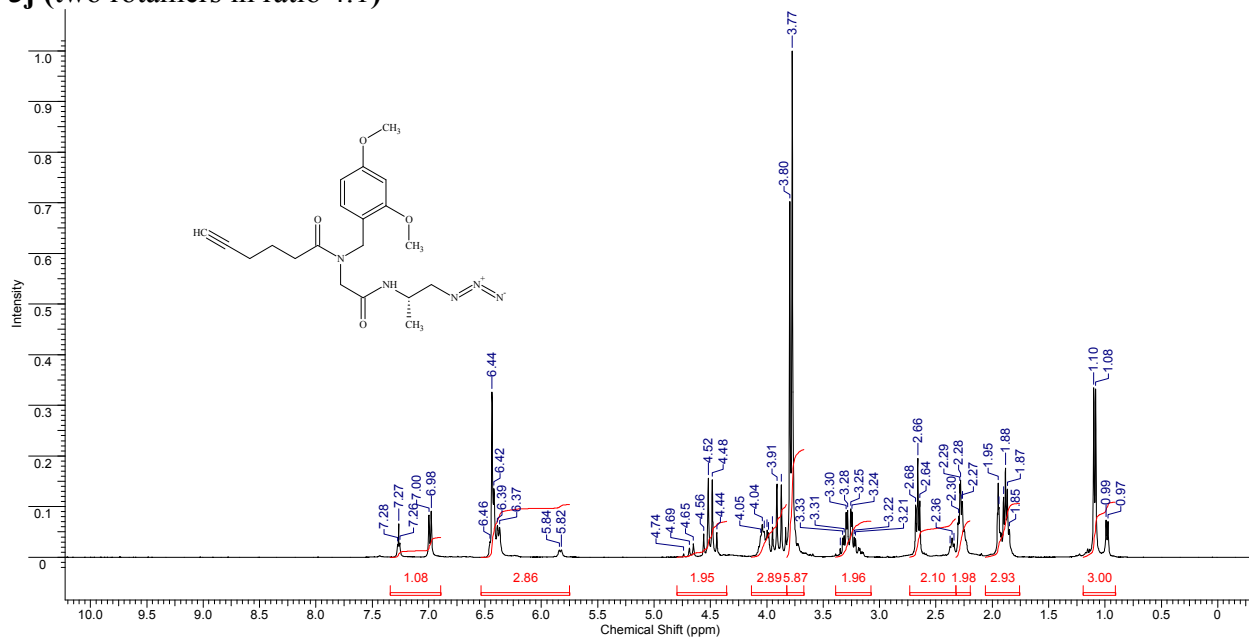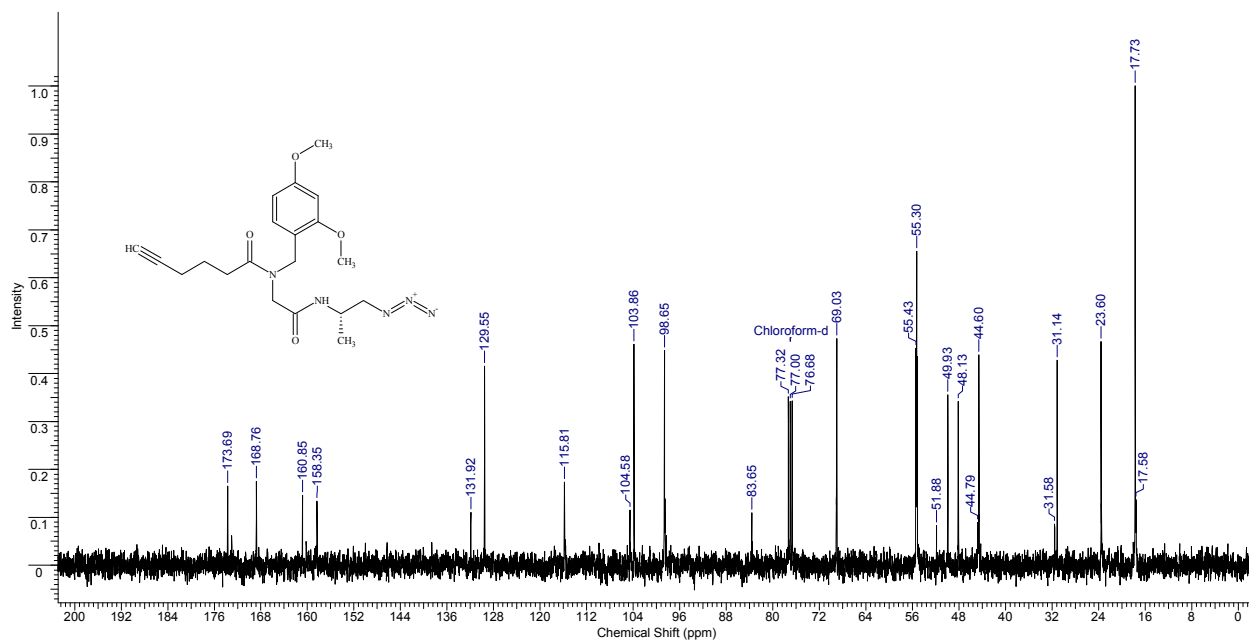

### 3k (several rotamers)

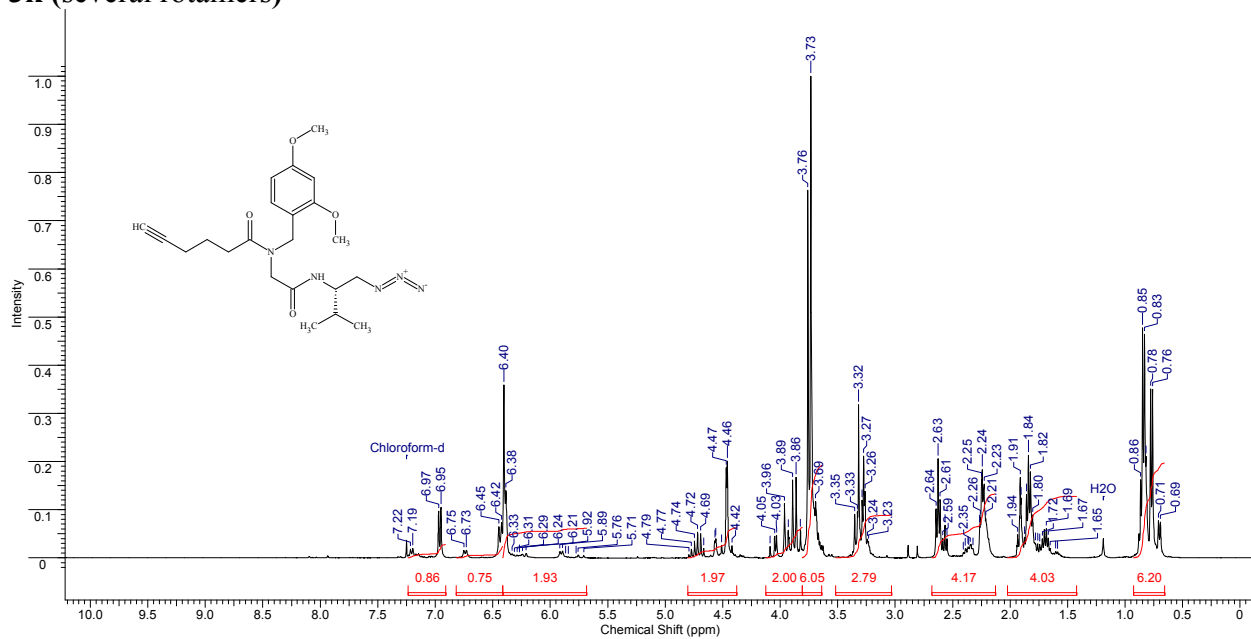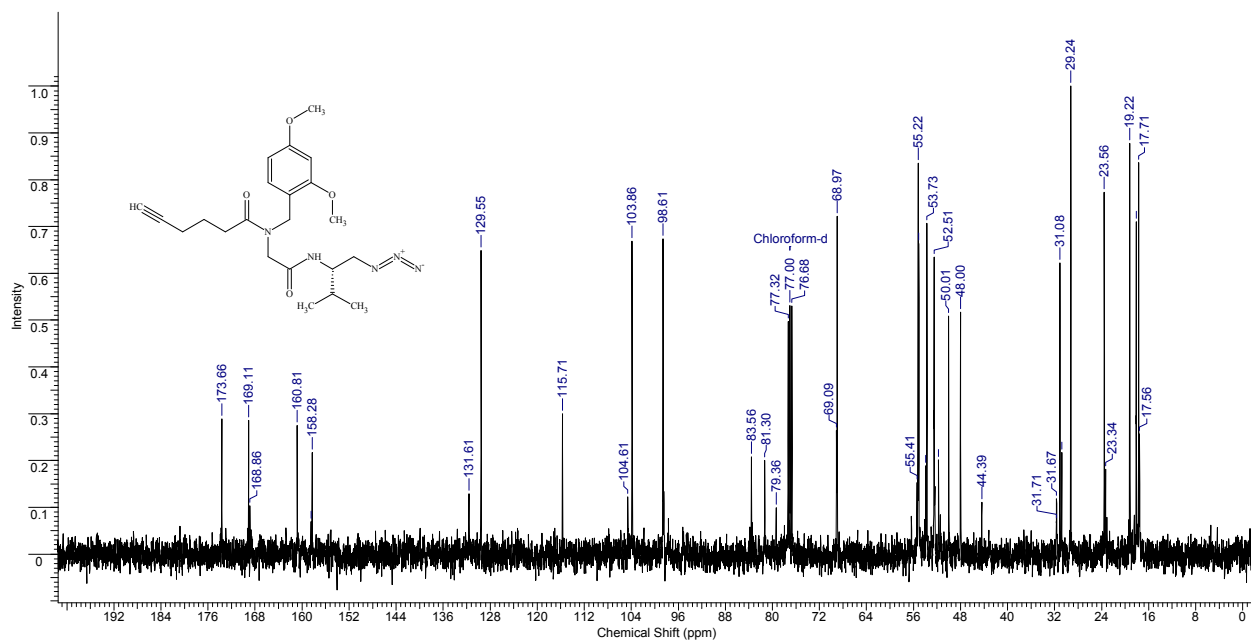

**3l** (two rotamers in ratio 3:1)

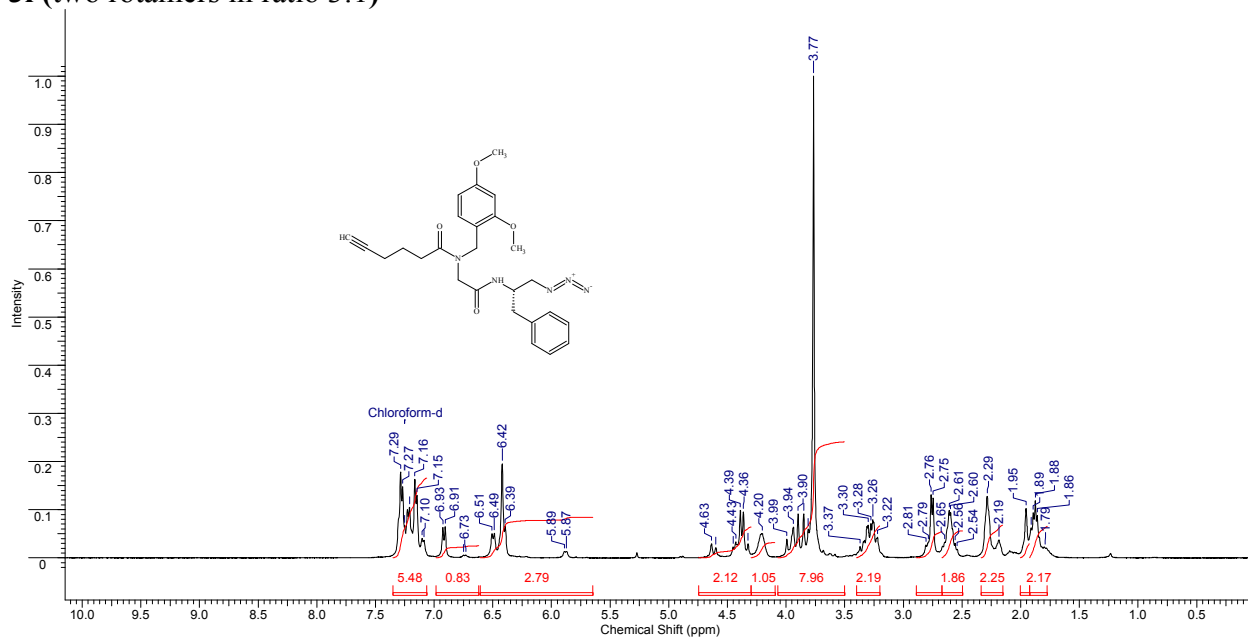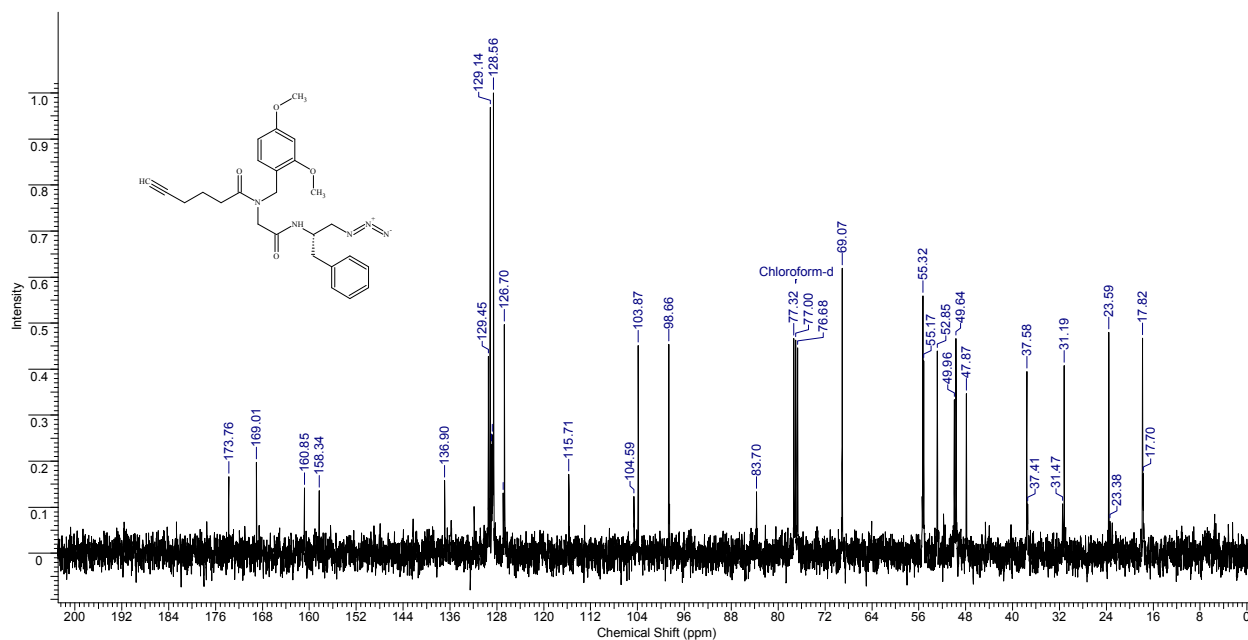

### 3m (two rotamers in ratio 5:1)

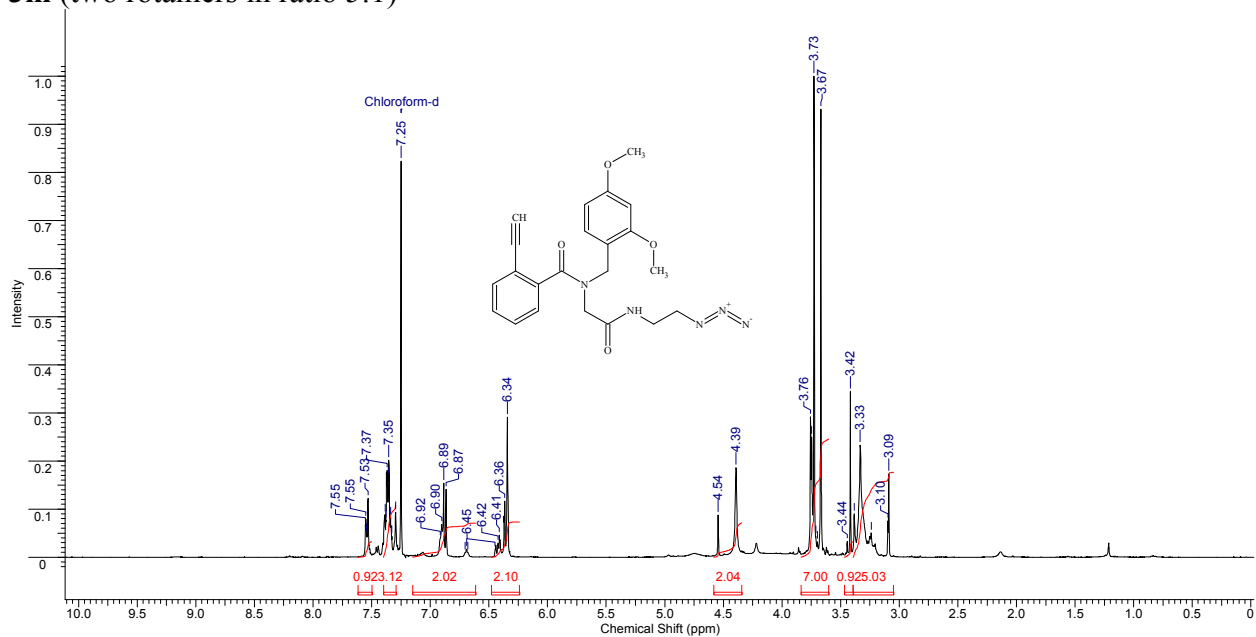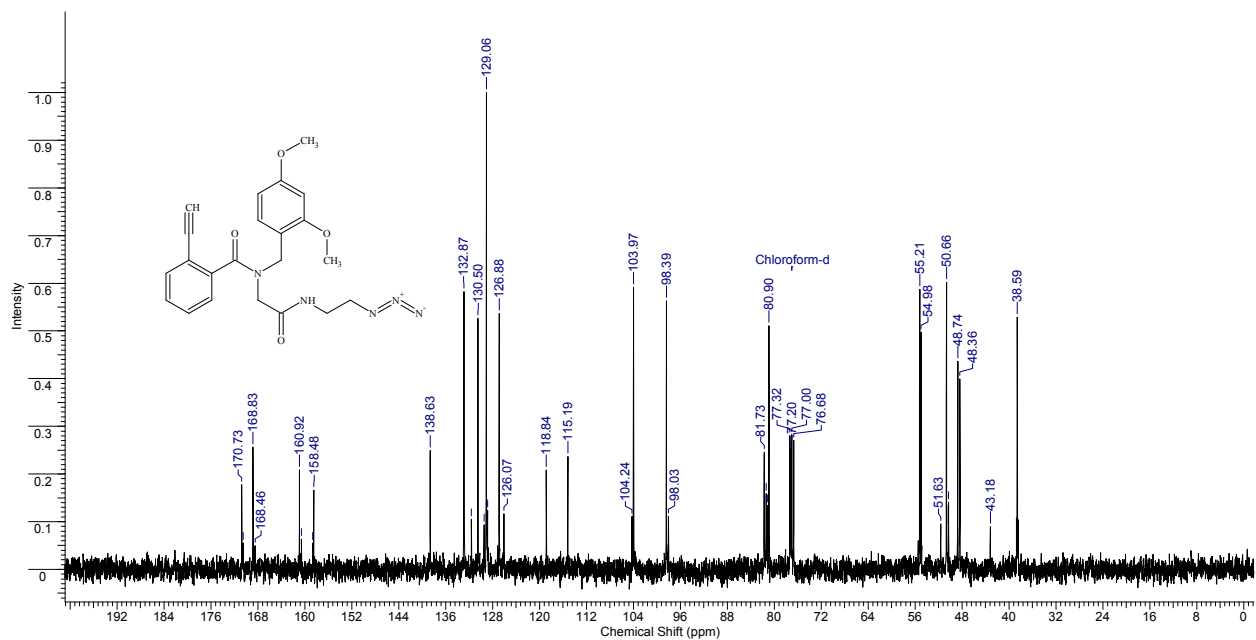

**3n**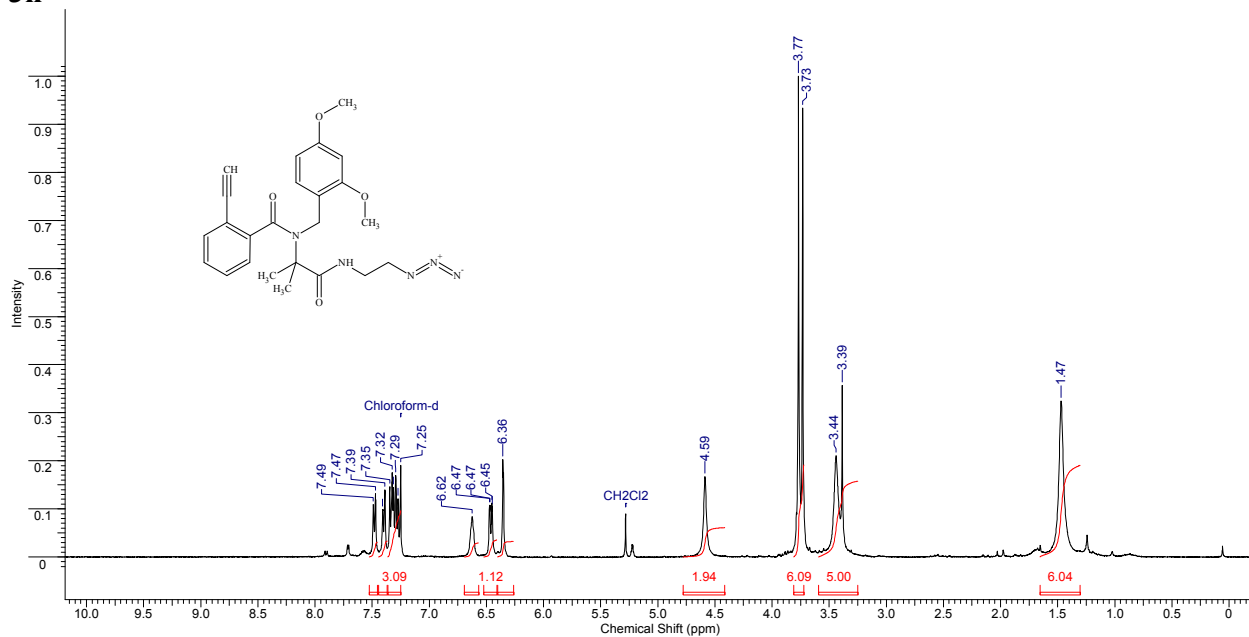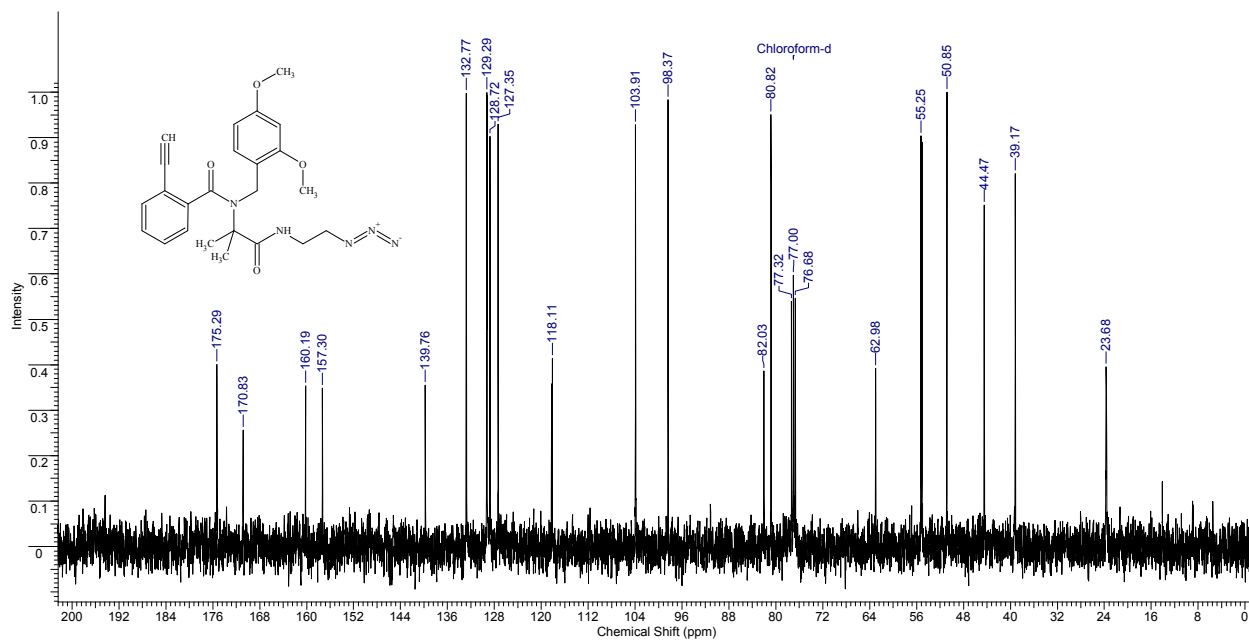

30

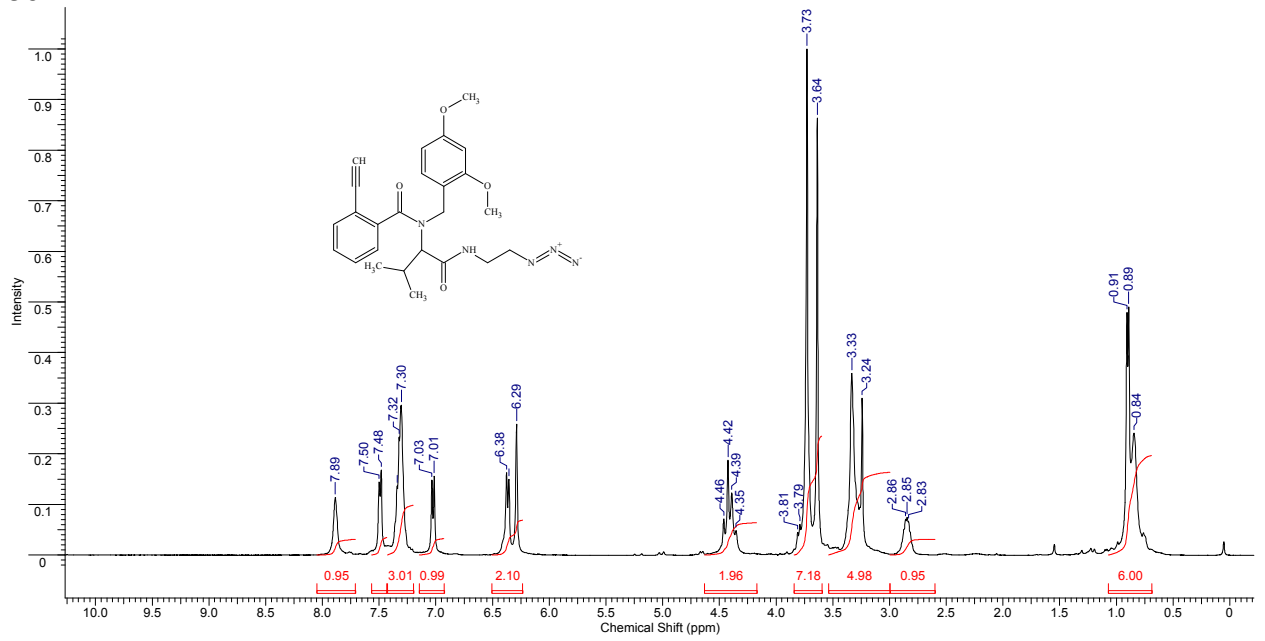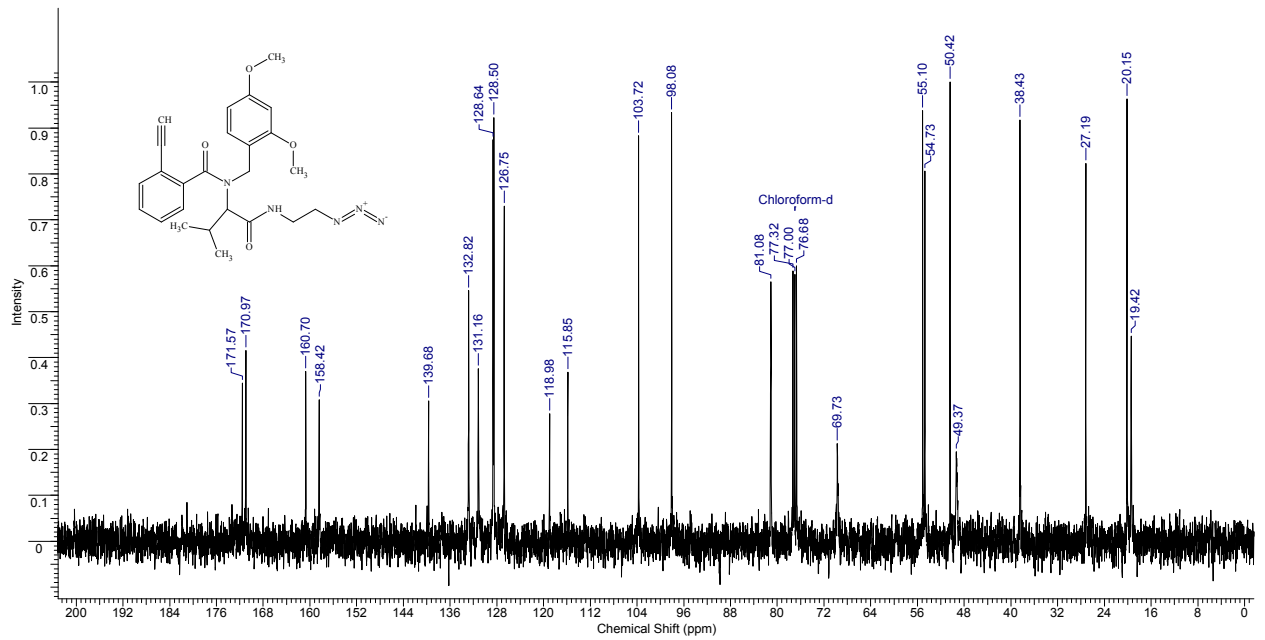



### 3p (two rotamers in ratio 4:1)

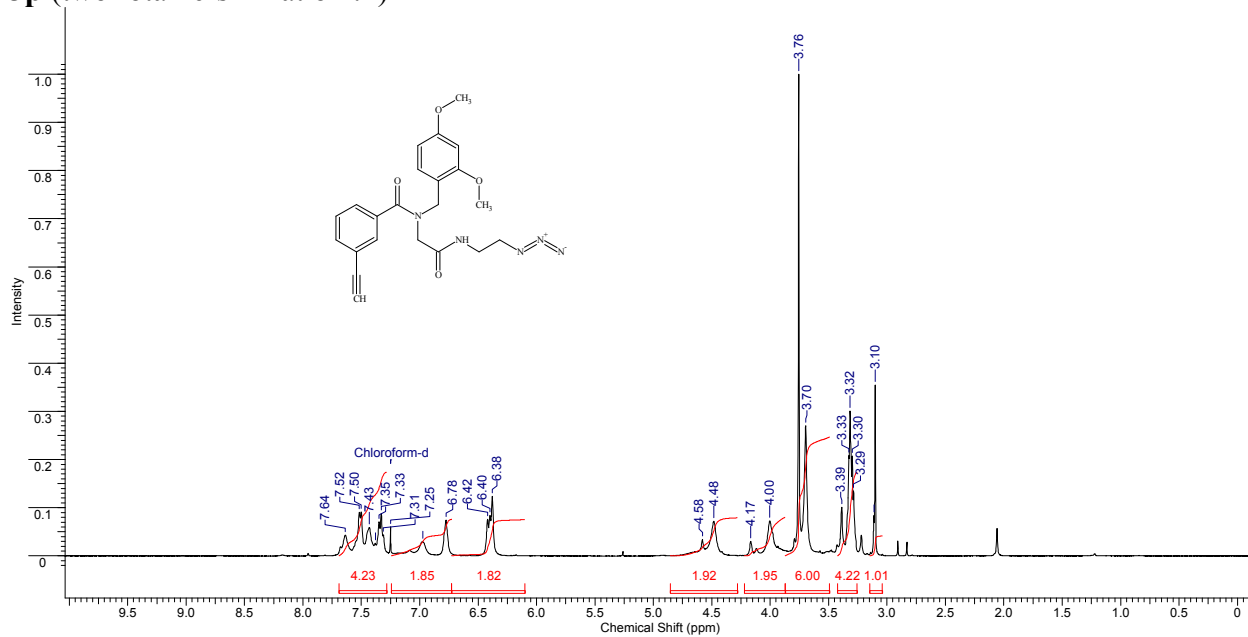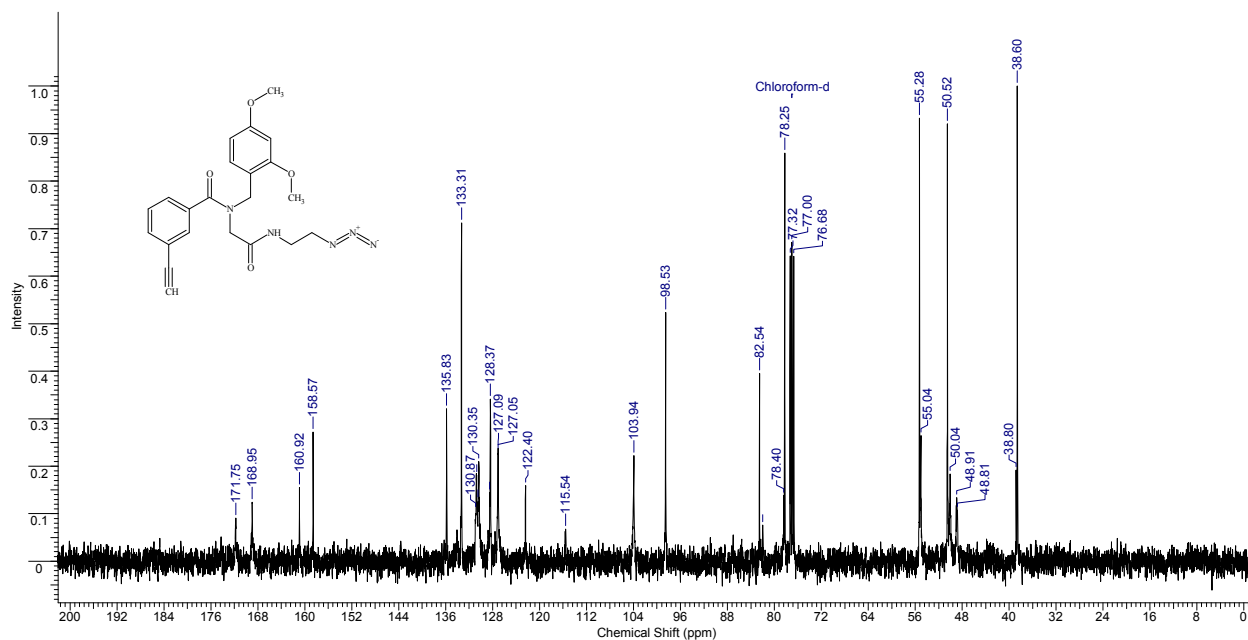

3q

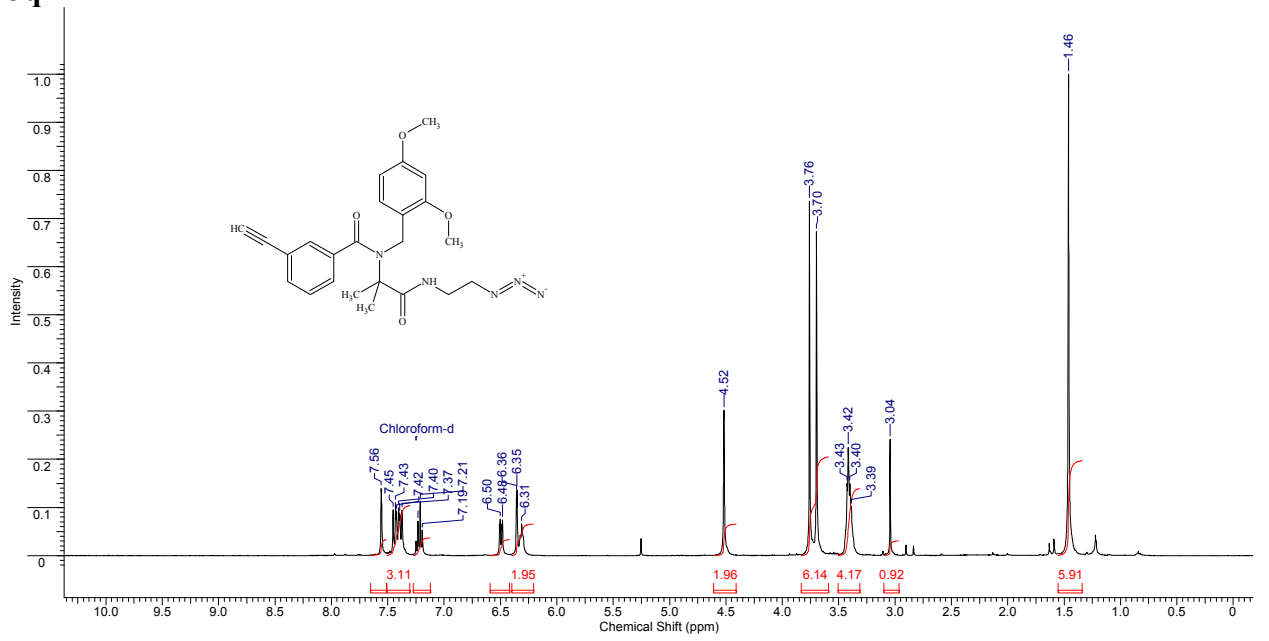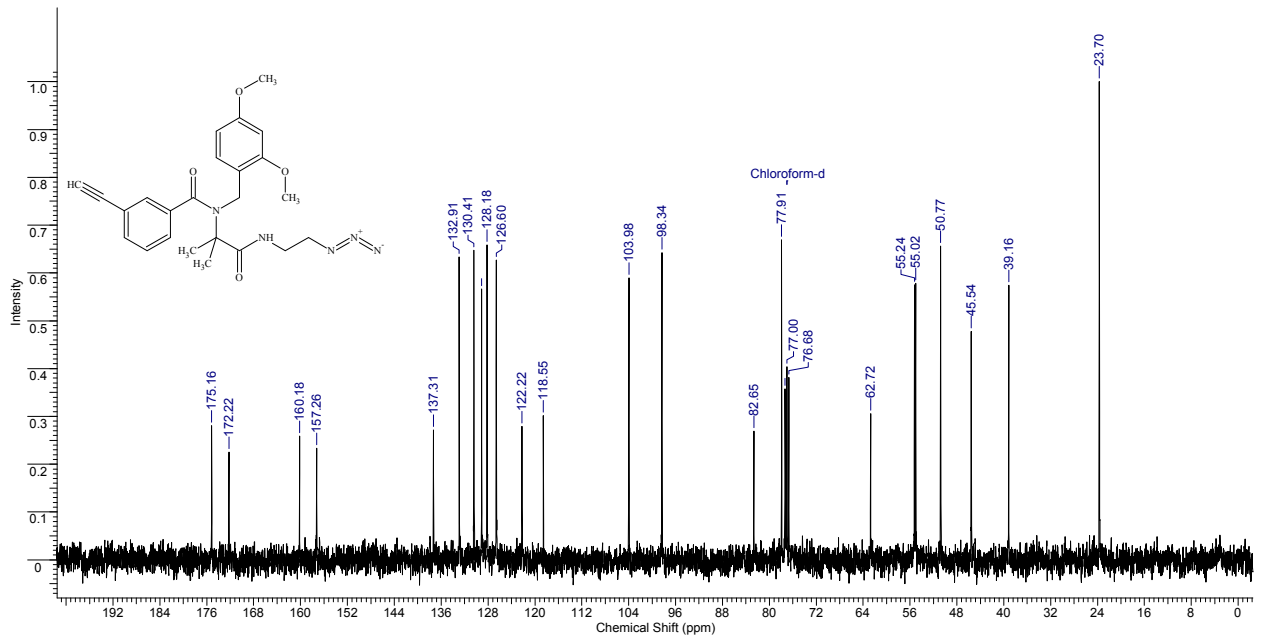

3r

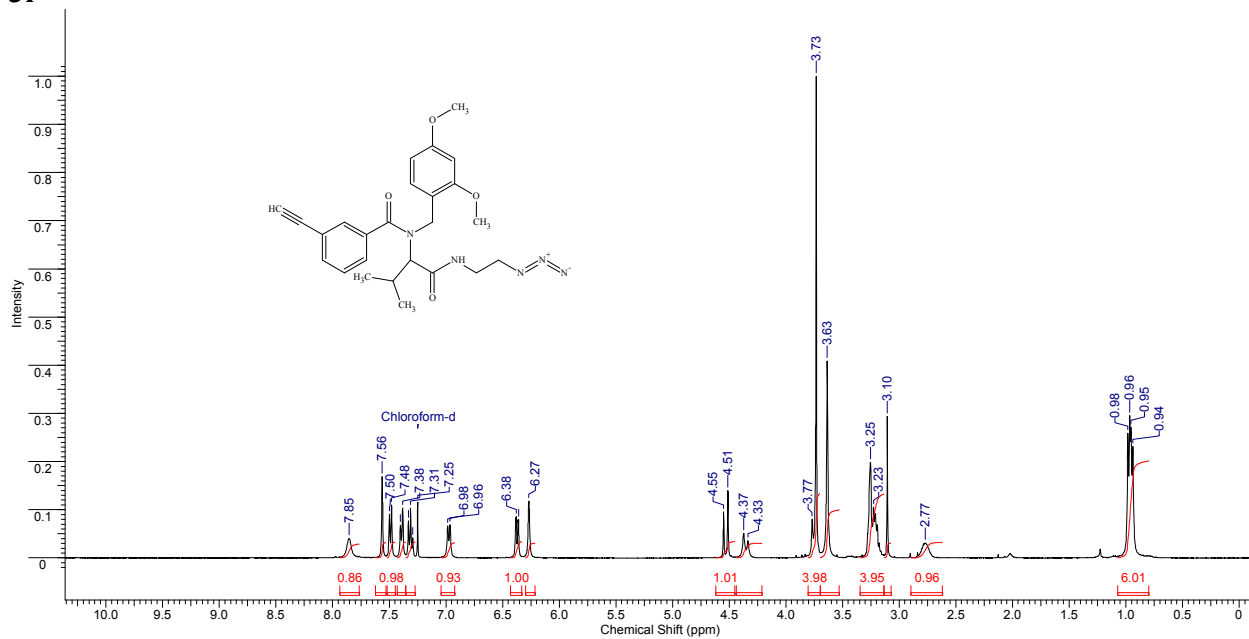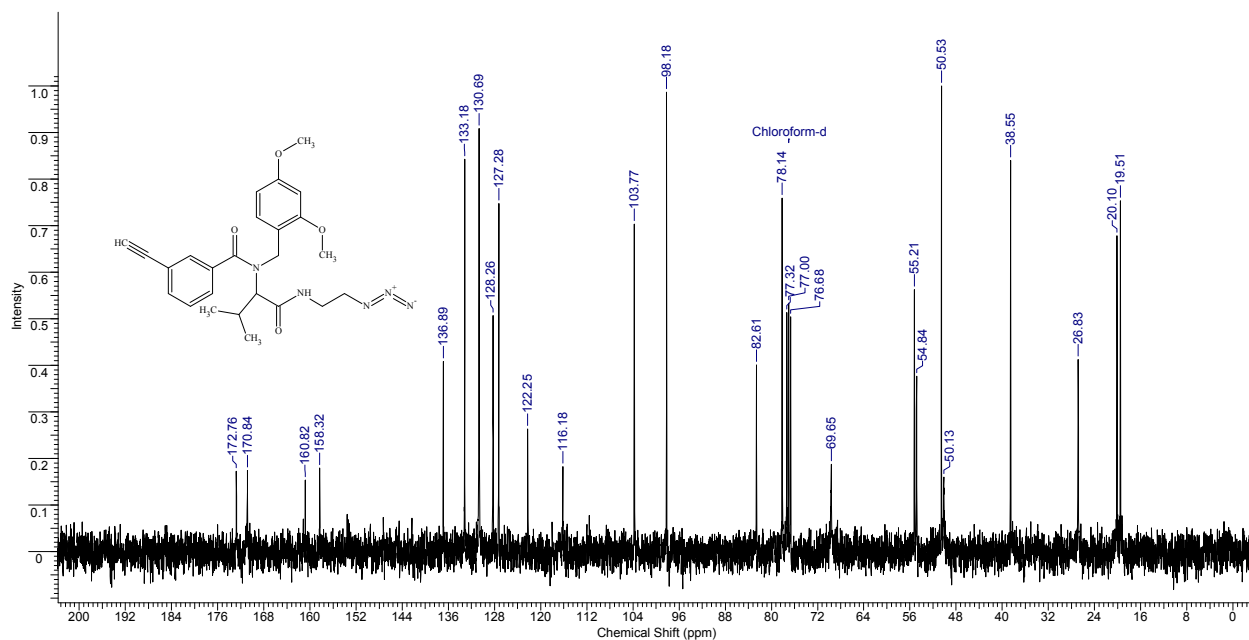

3s

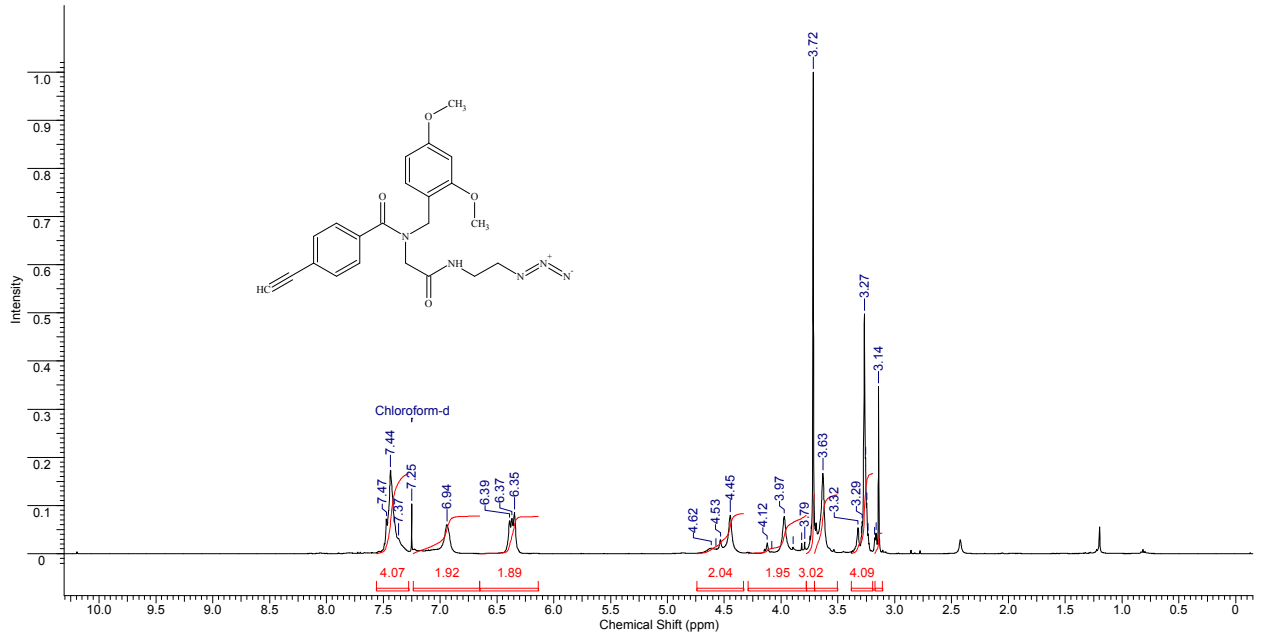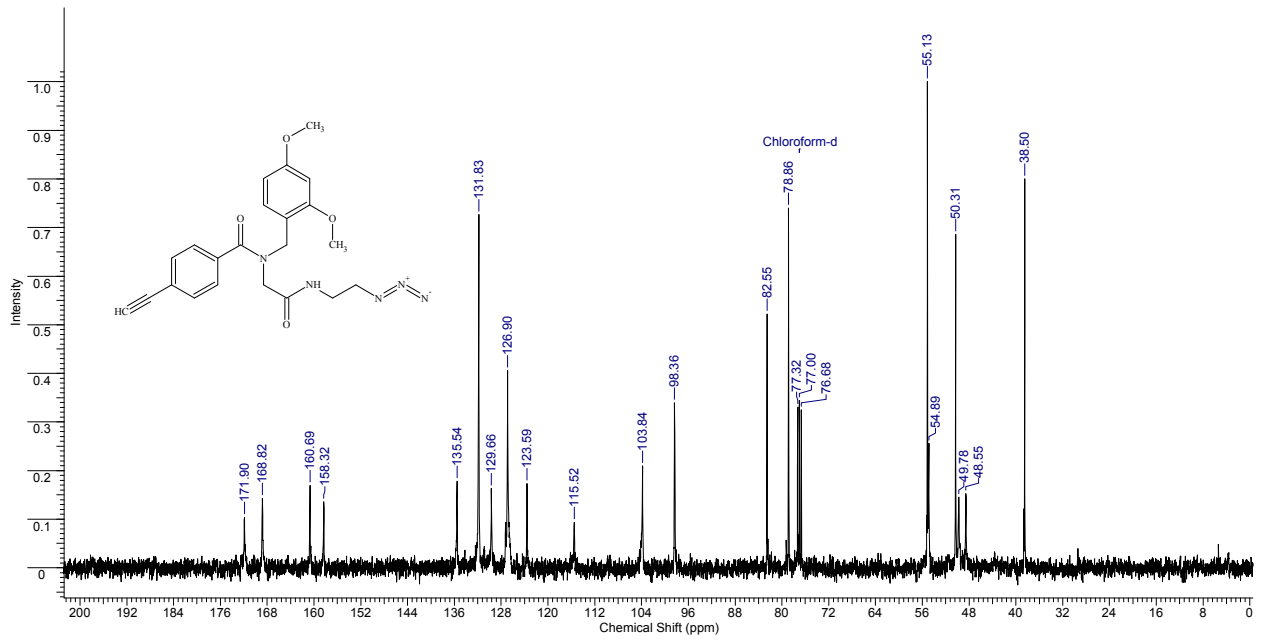

3t

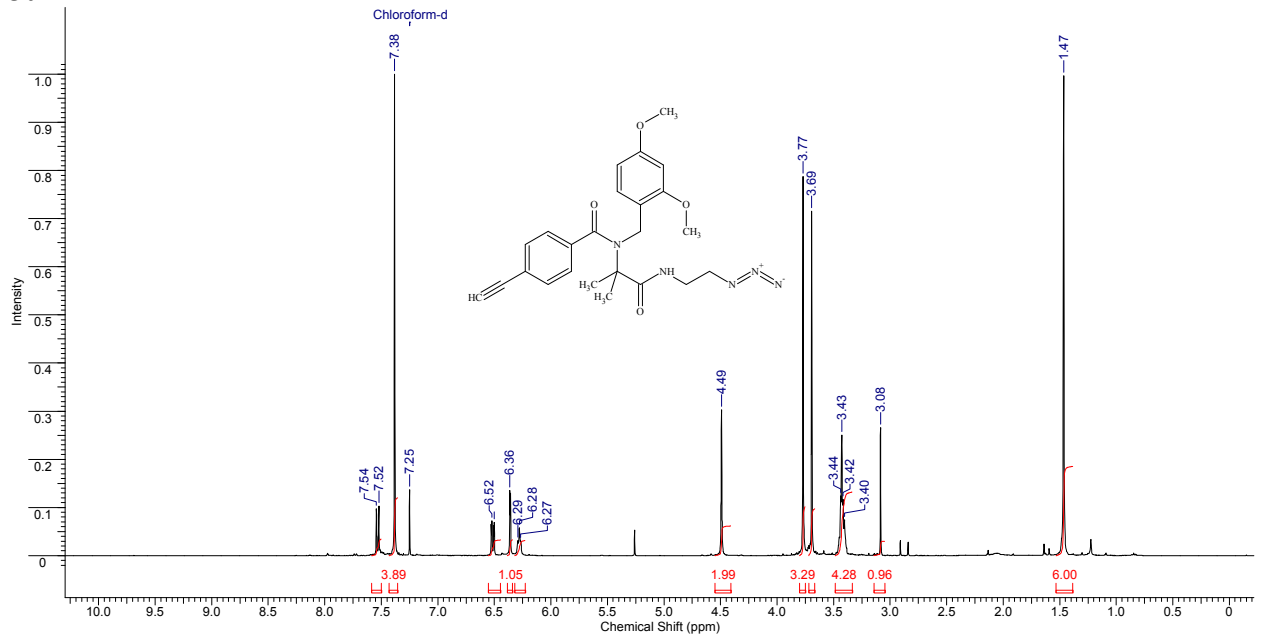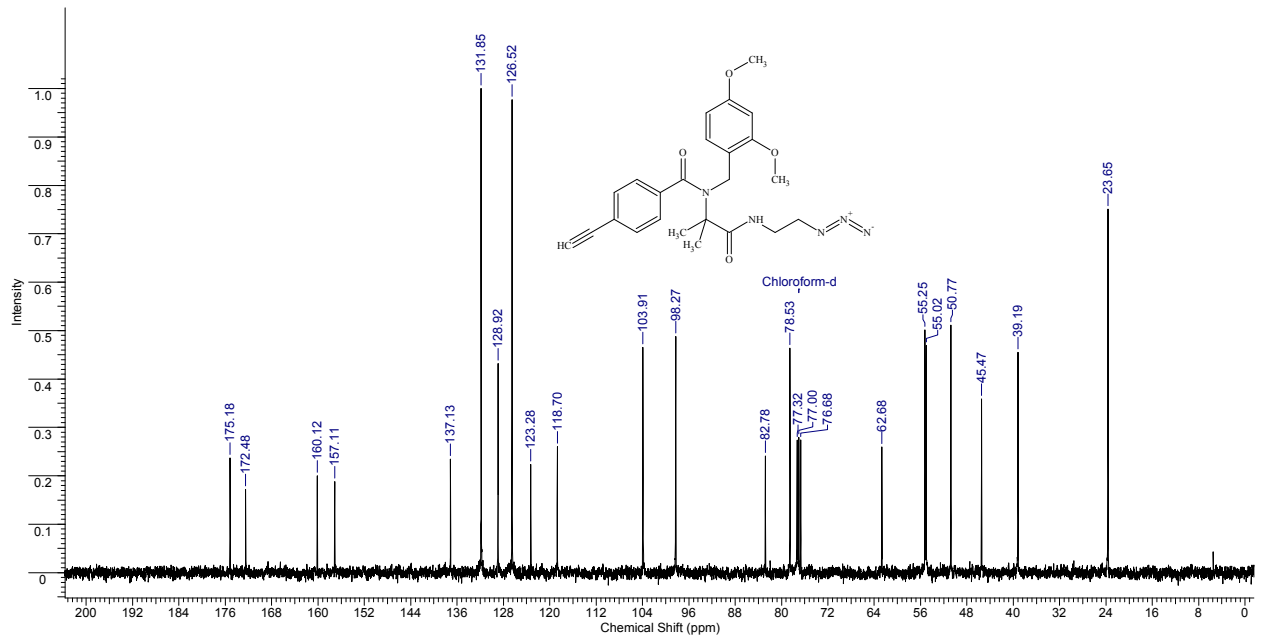

### 3u (One major rotamer and several minors in traces amounts)

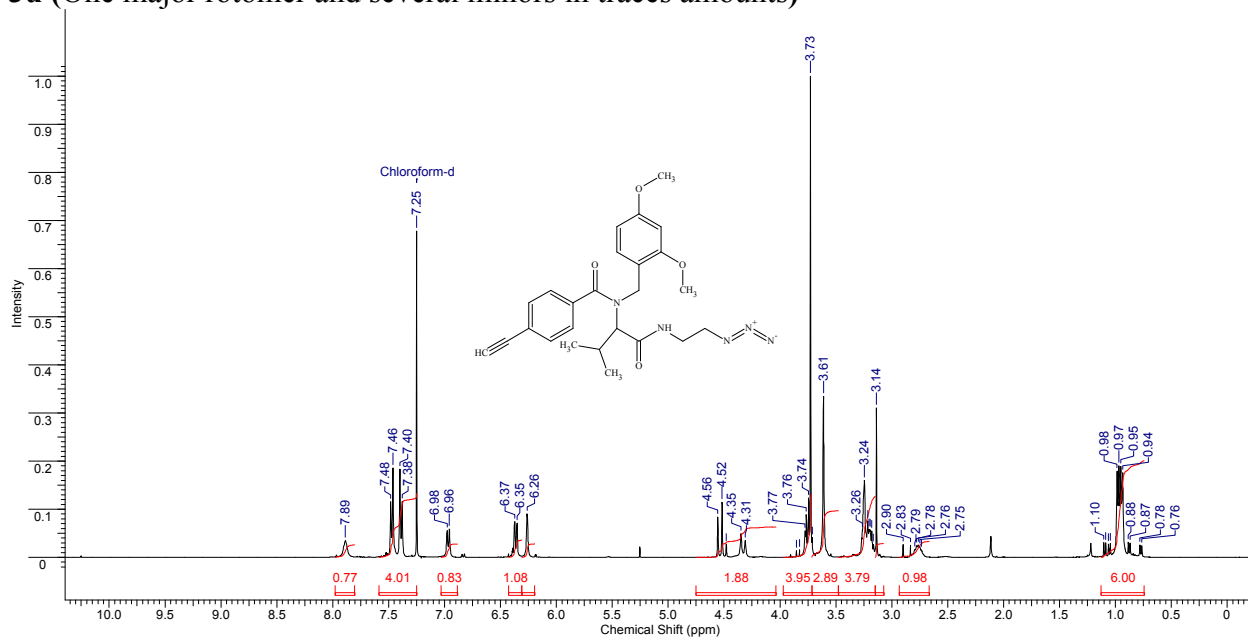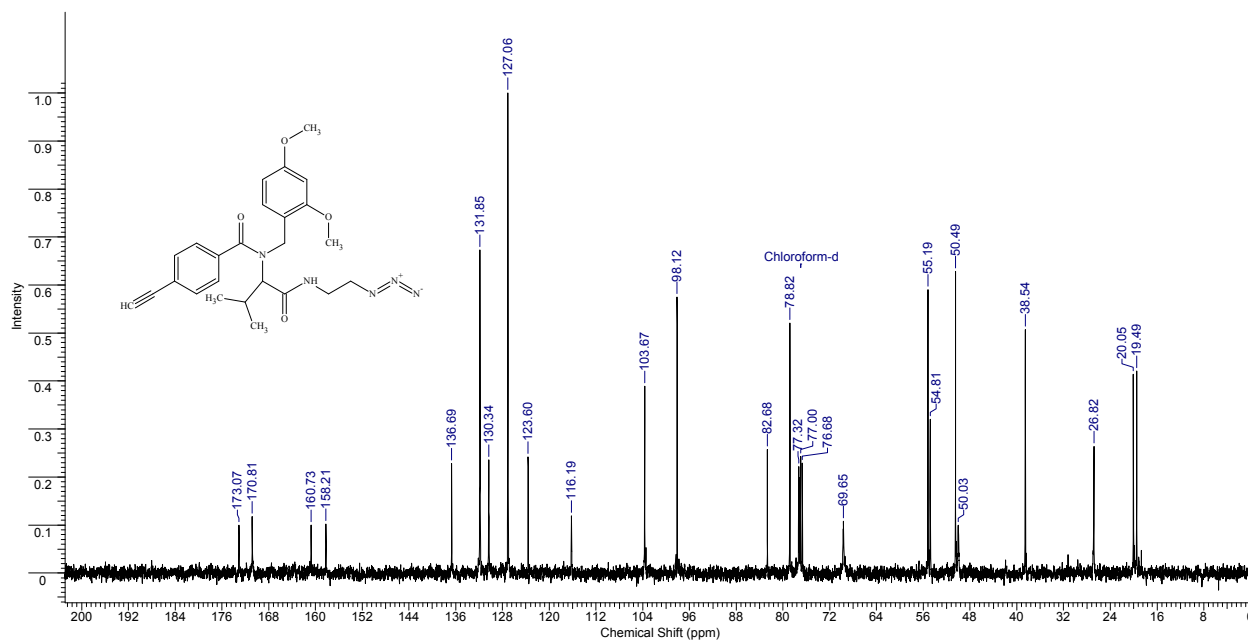

4d

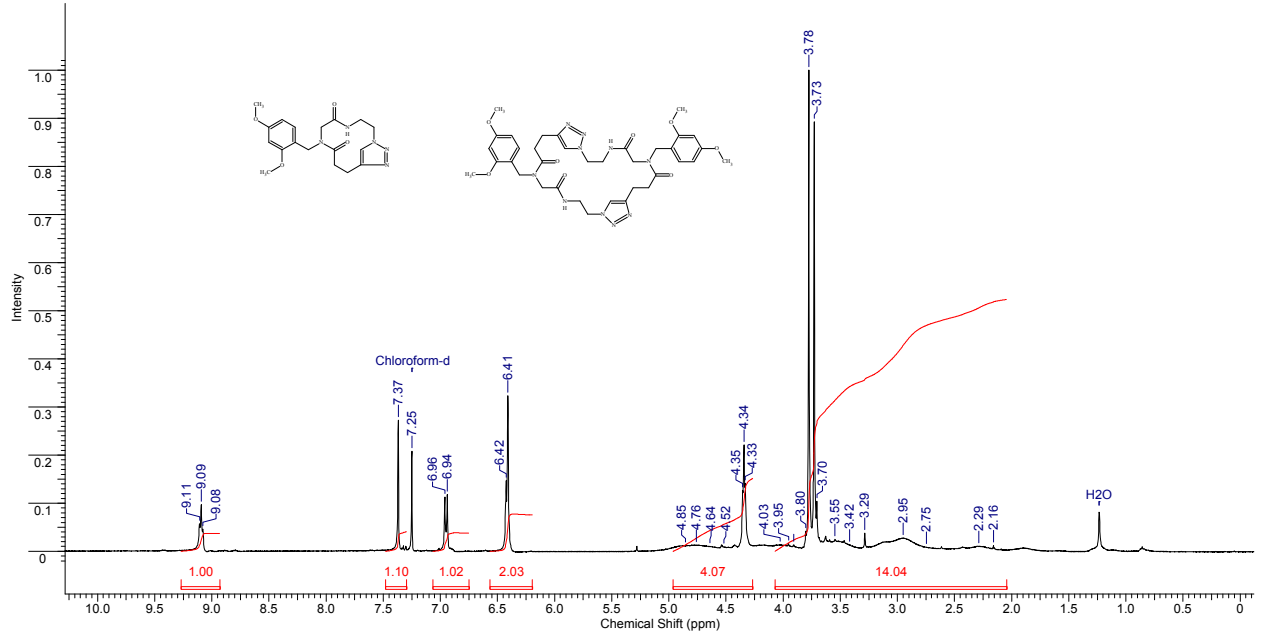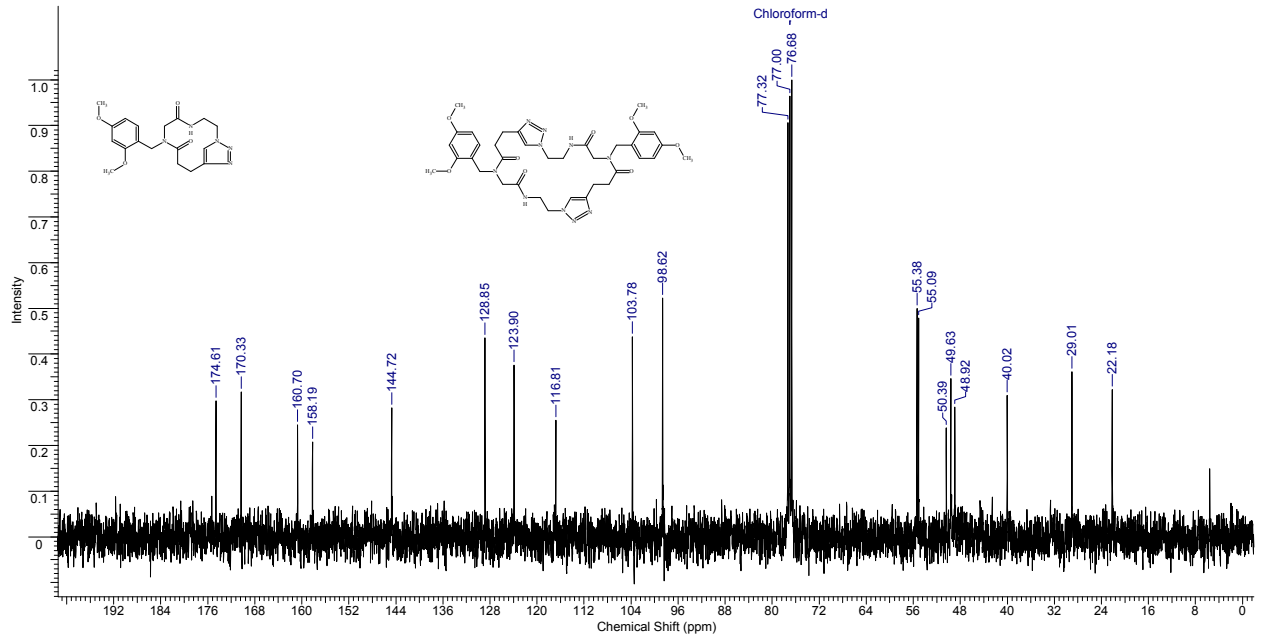

4e

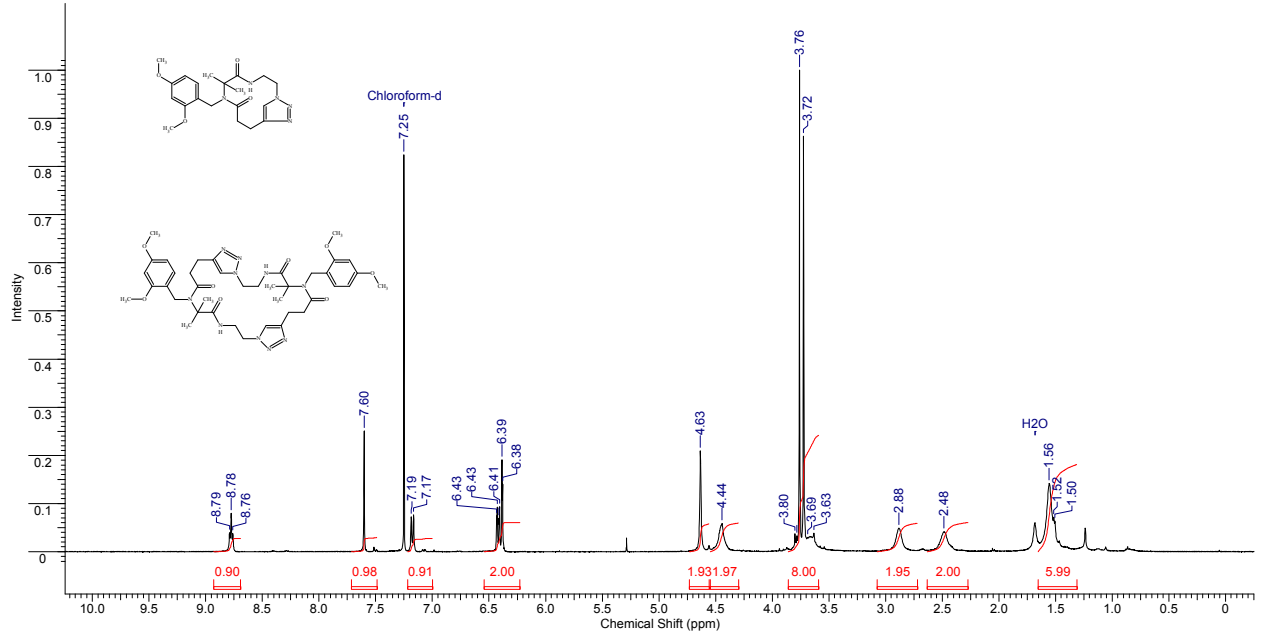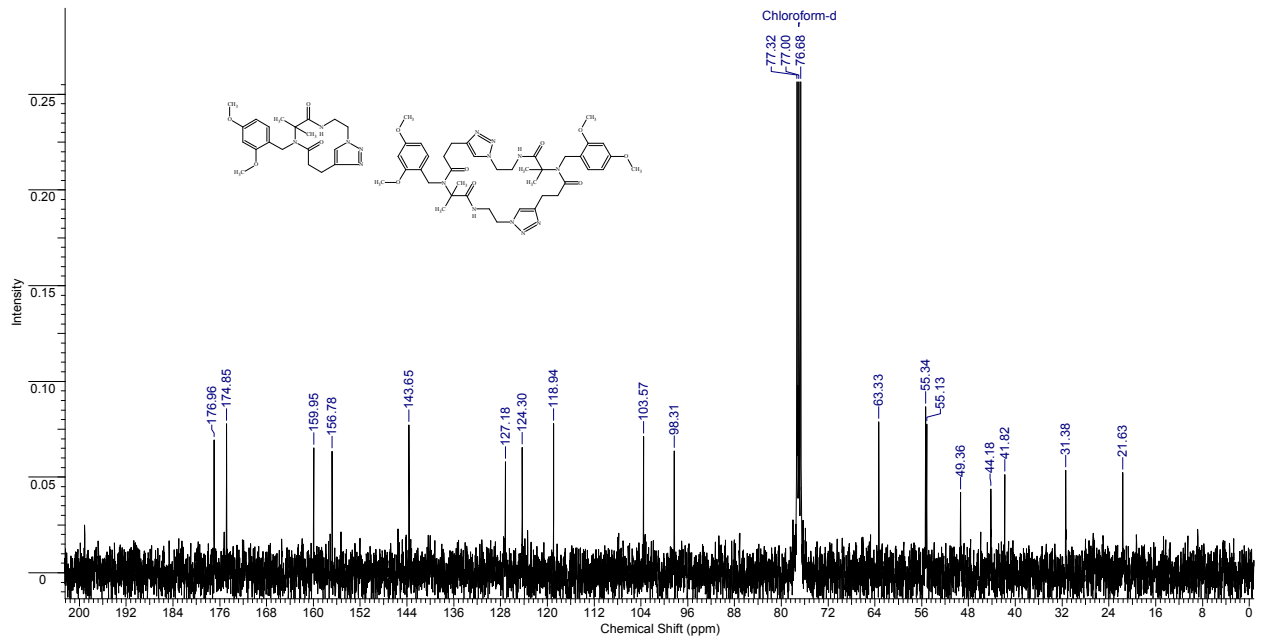



4g

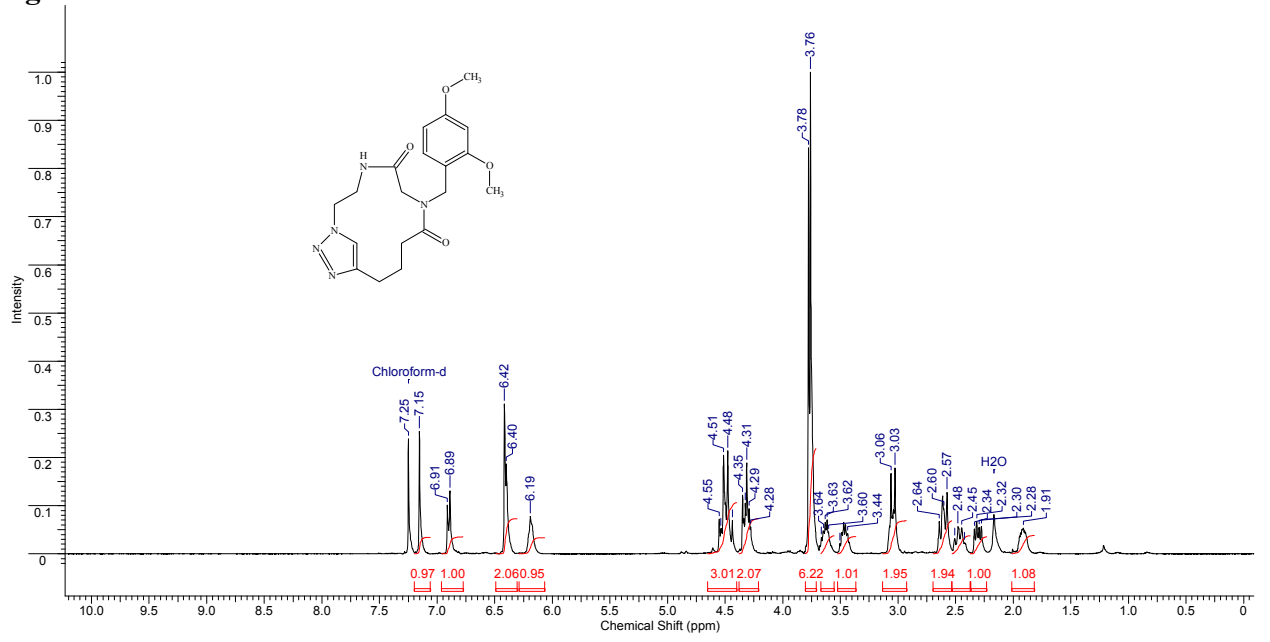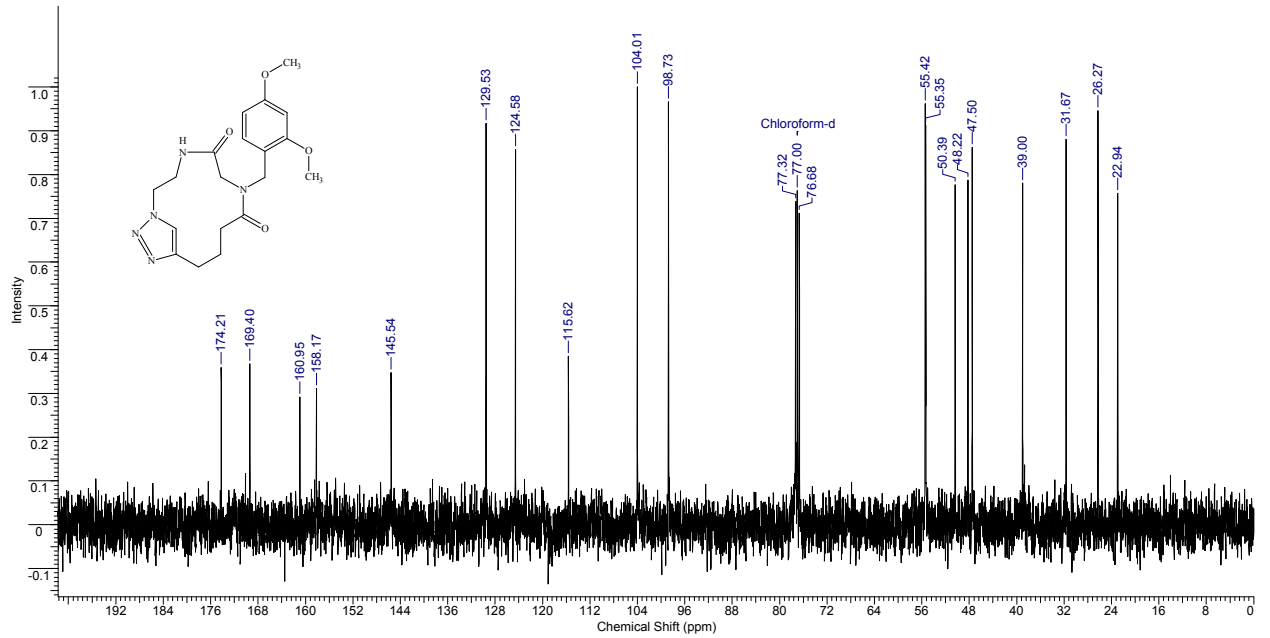

4h

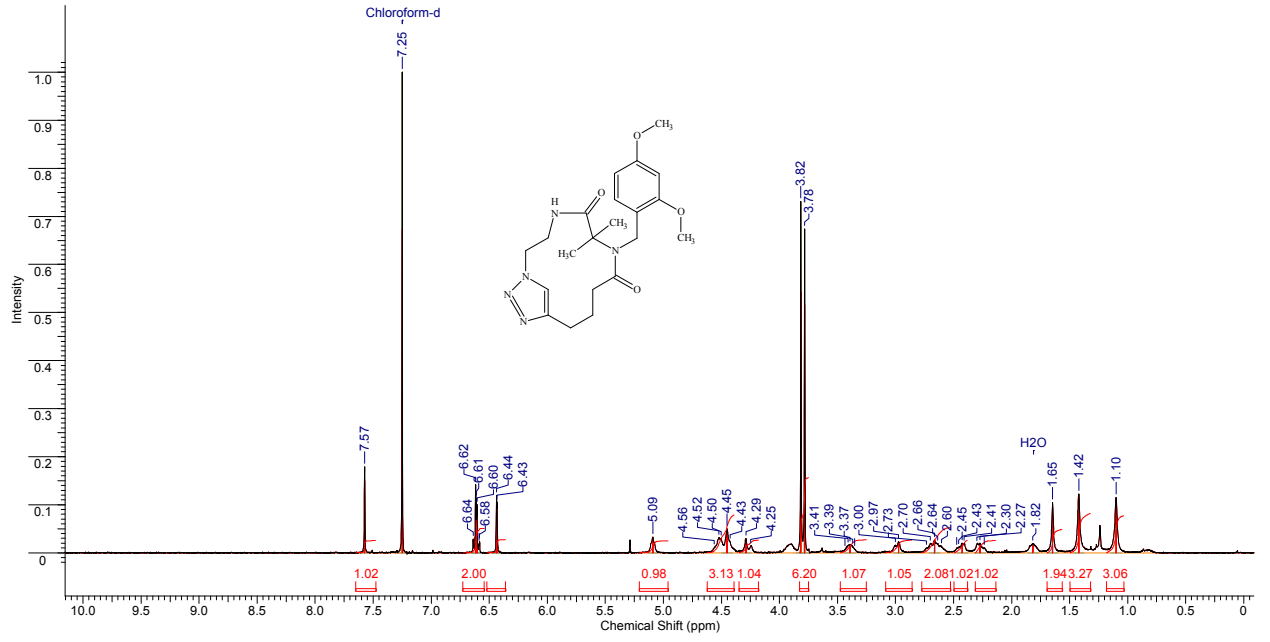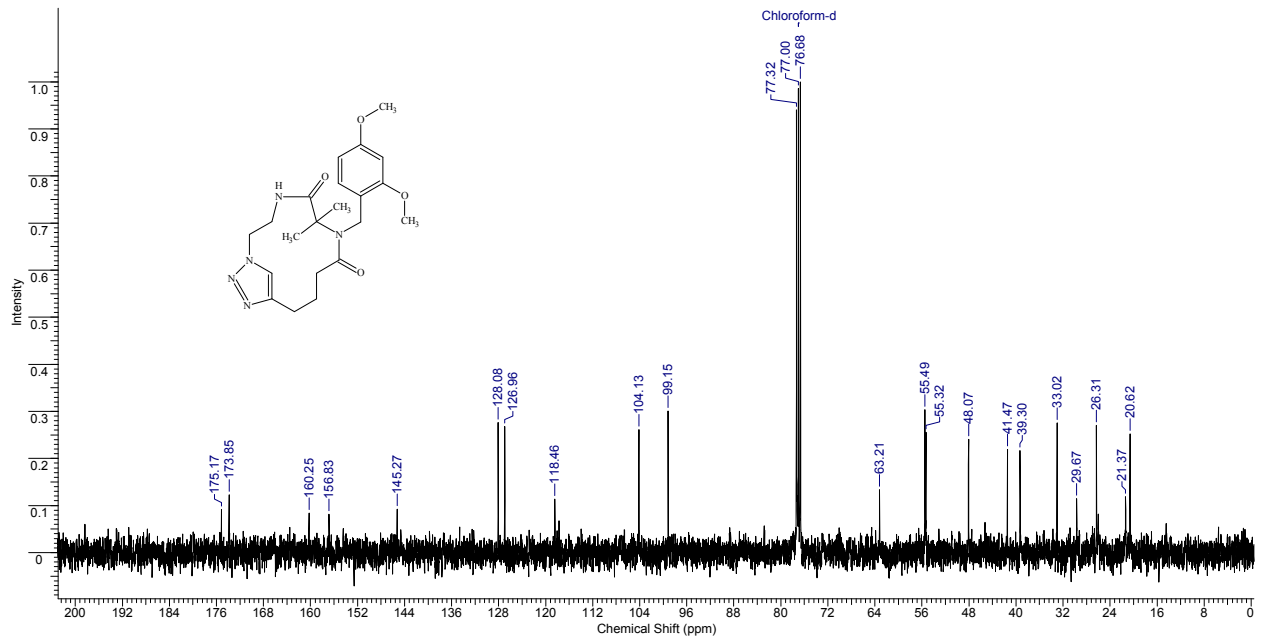

**4i** (two conformer in ratio 3:1)

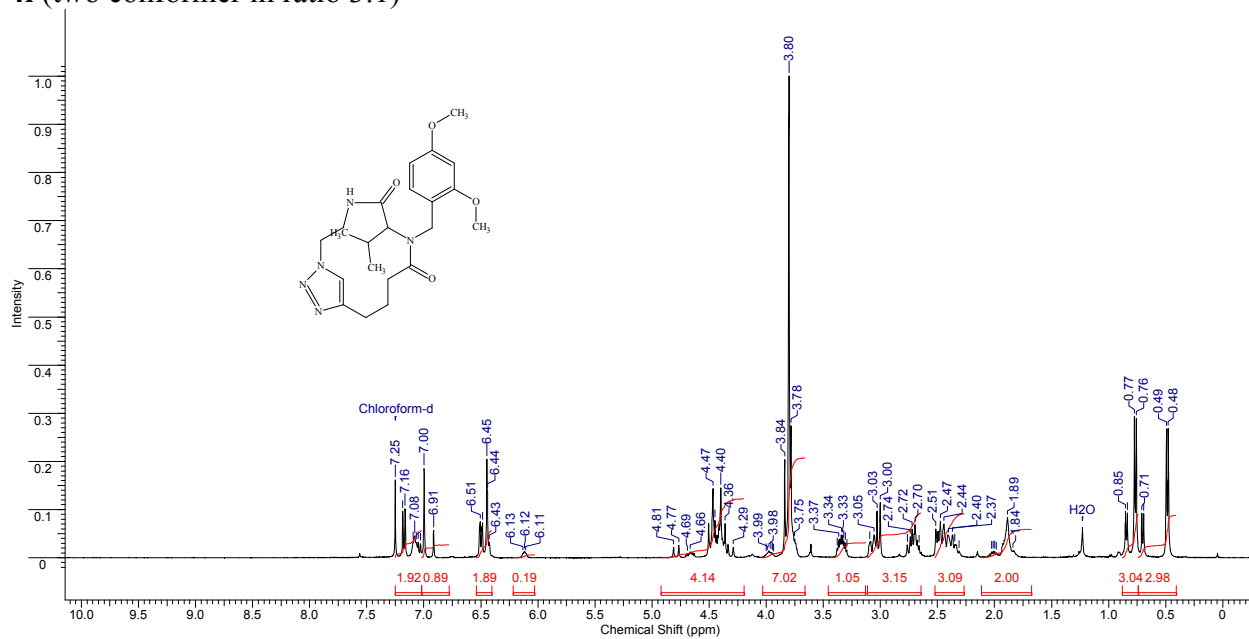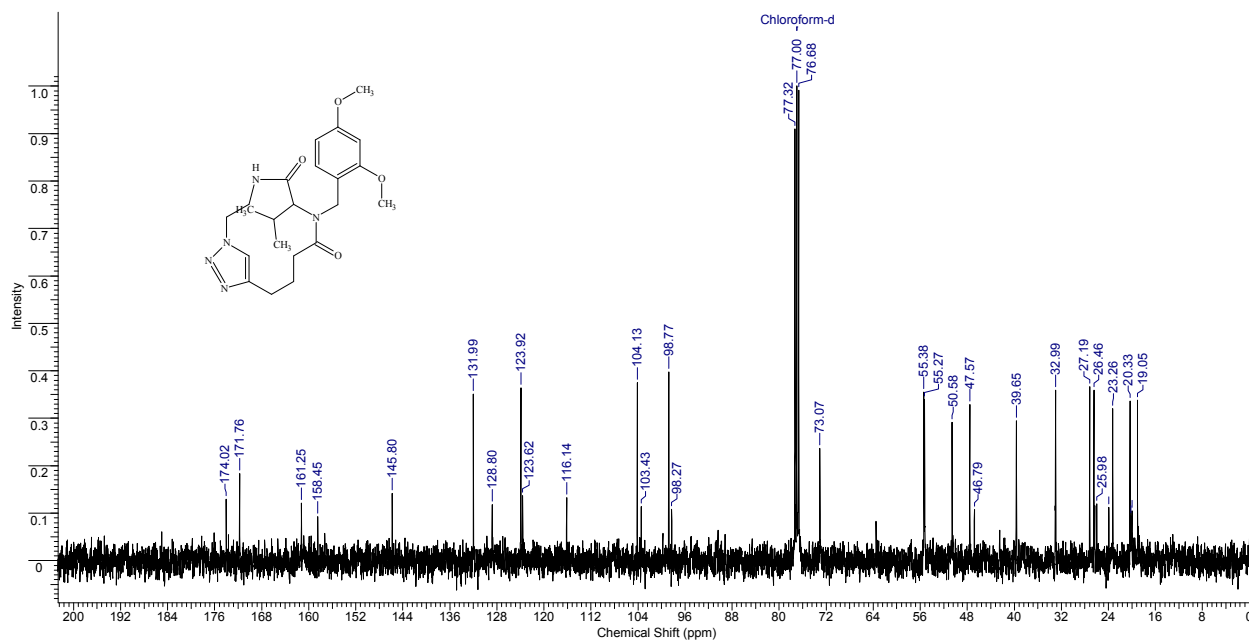

### 4j (two conformers in ratio 2:1)

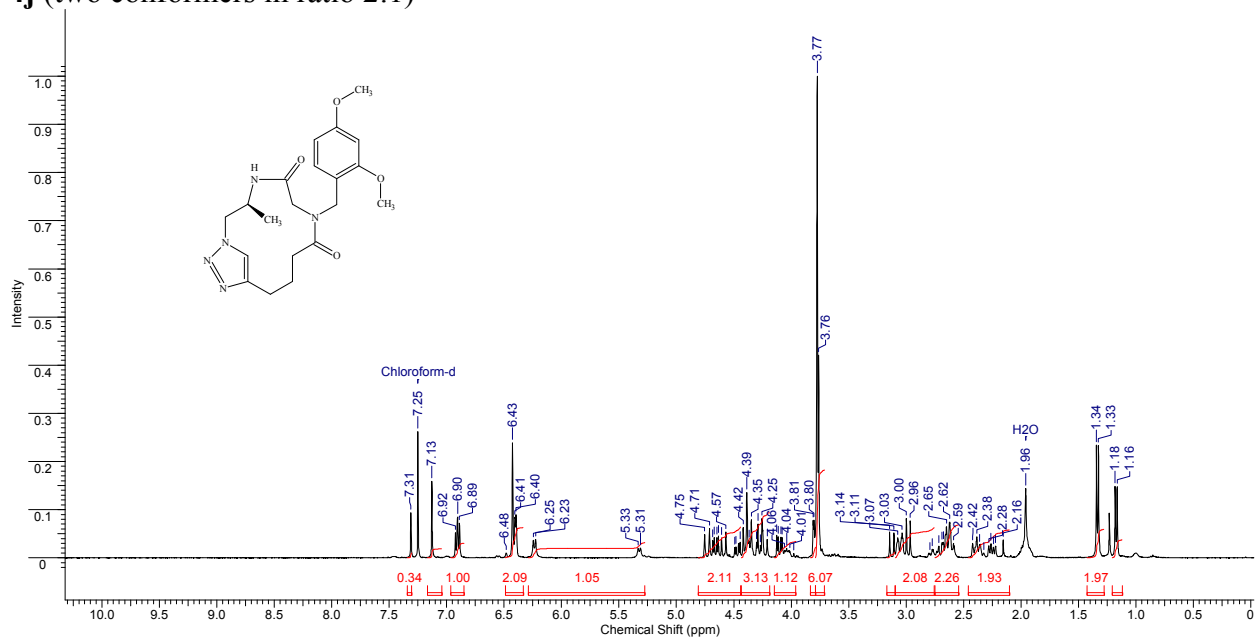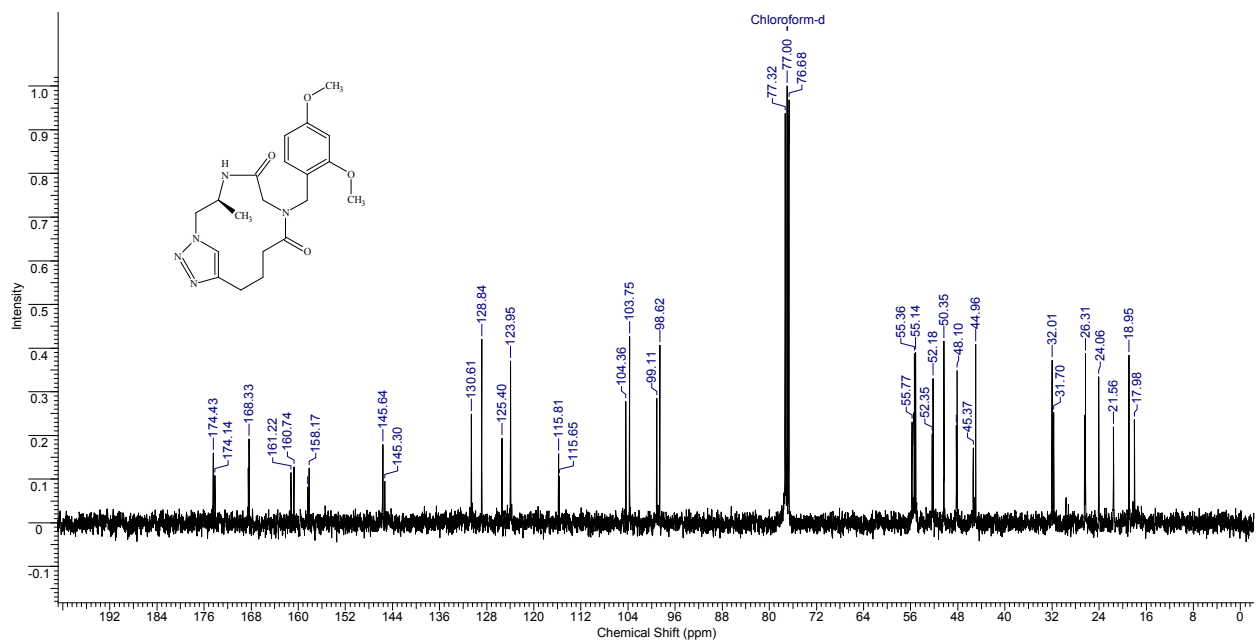

4k (several conformers)

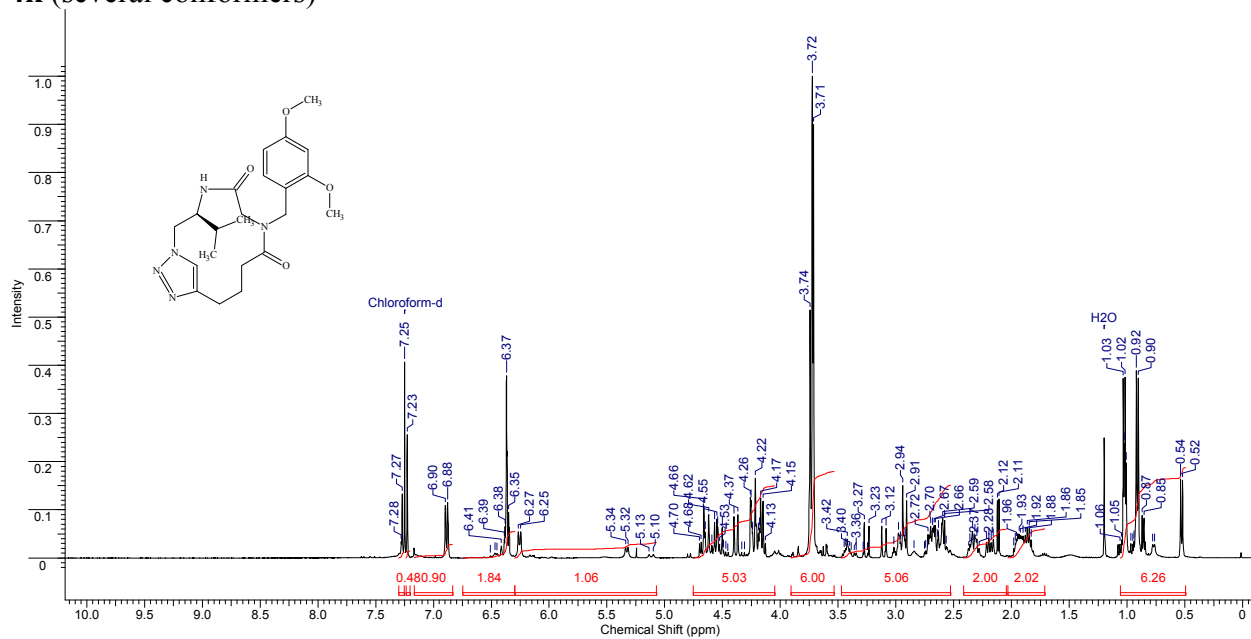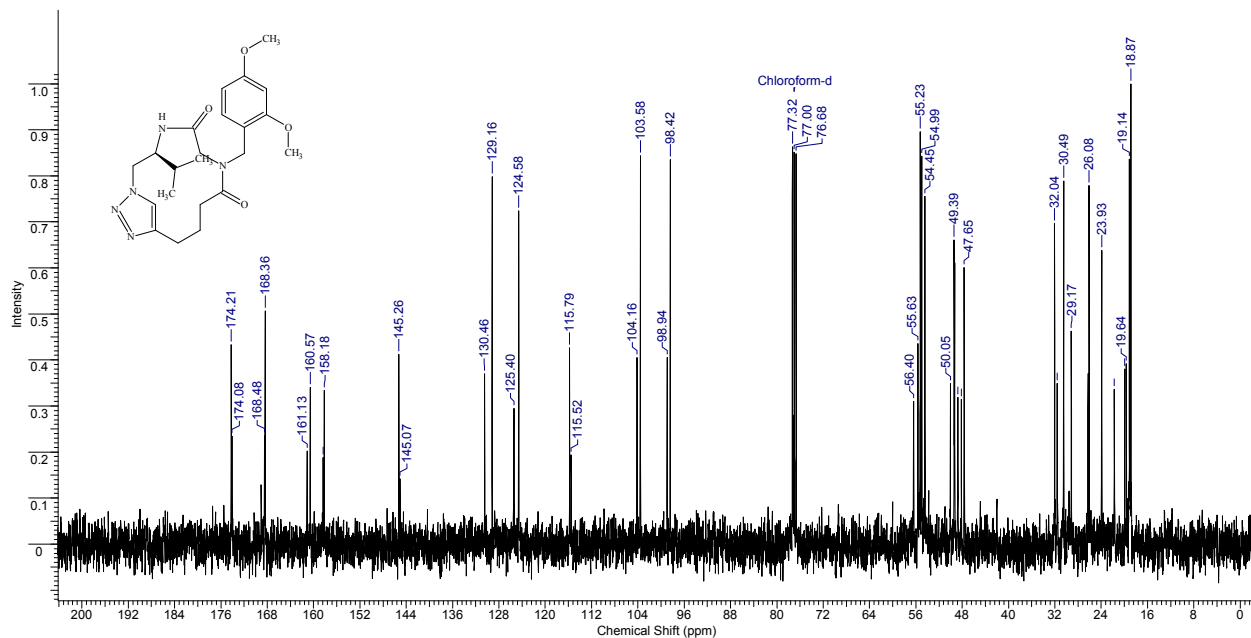

#### 4I (several conformers)

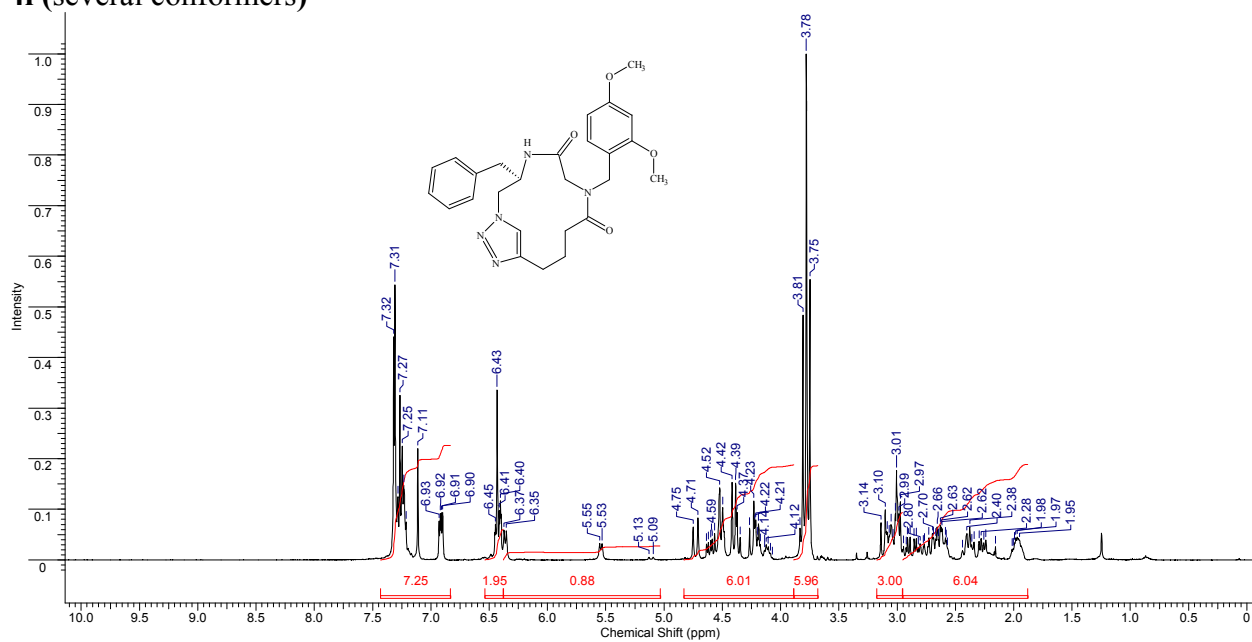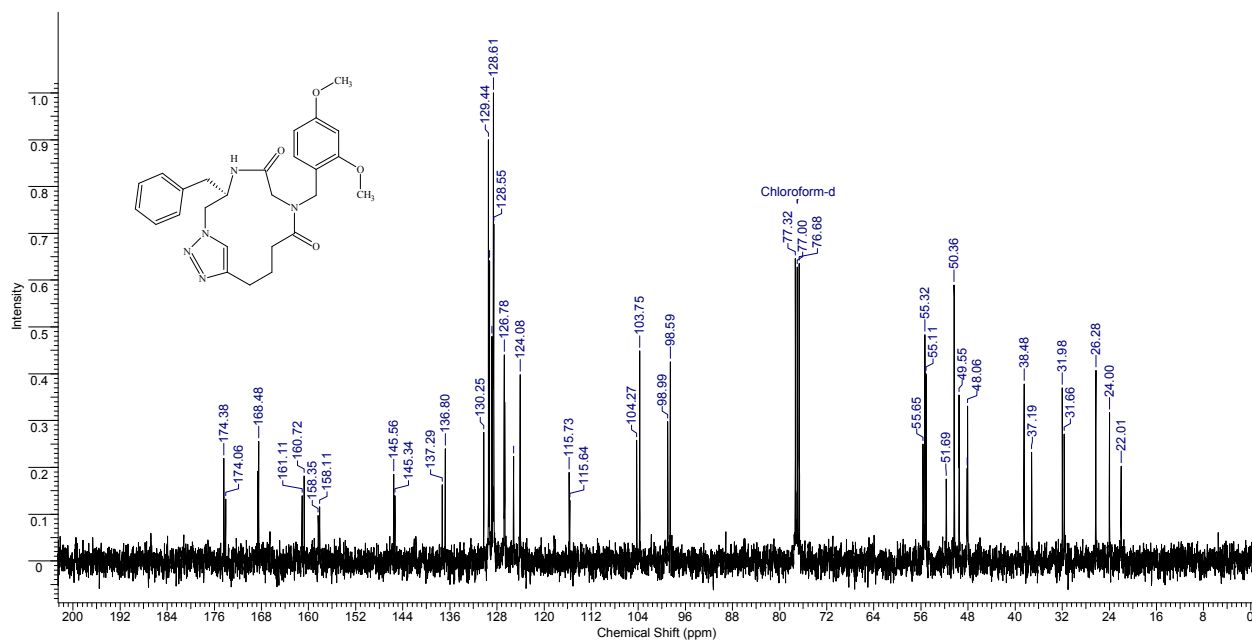

### 4m (the mixture of monomer and dimer in ratio 1:1)

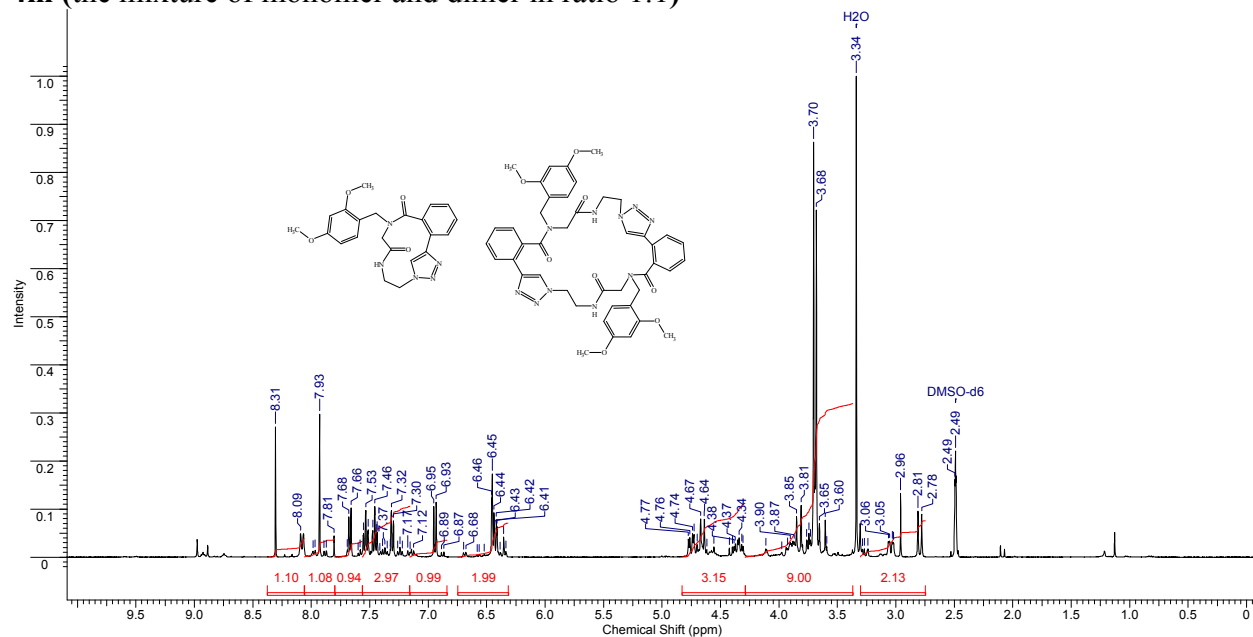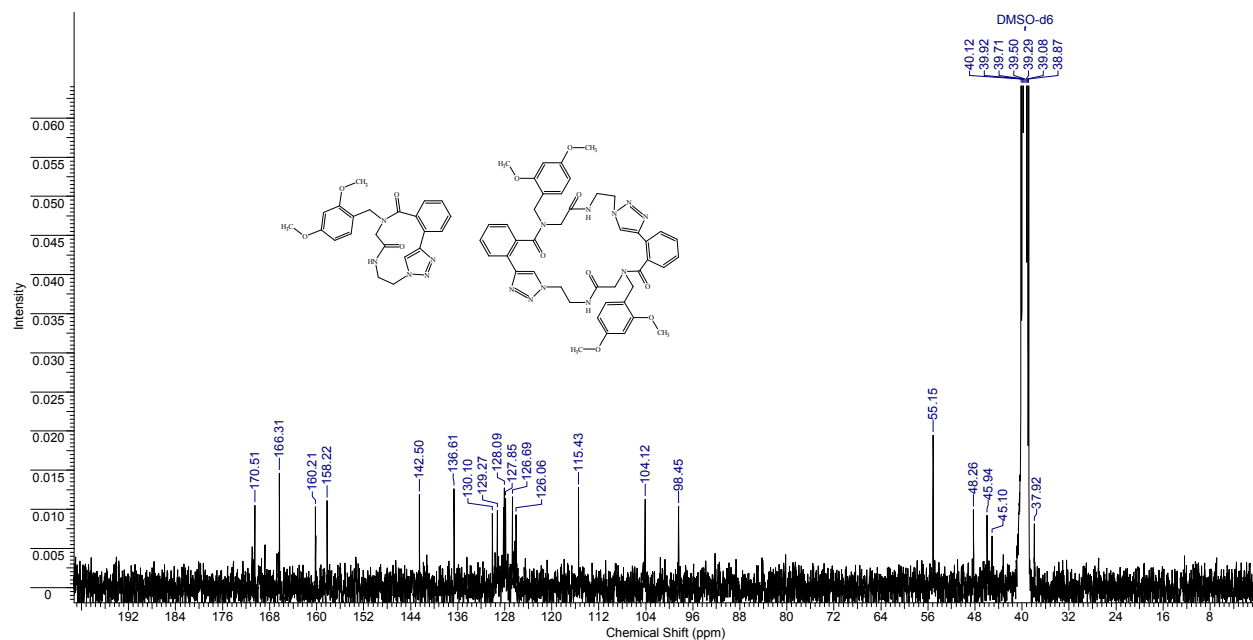

4n

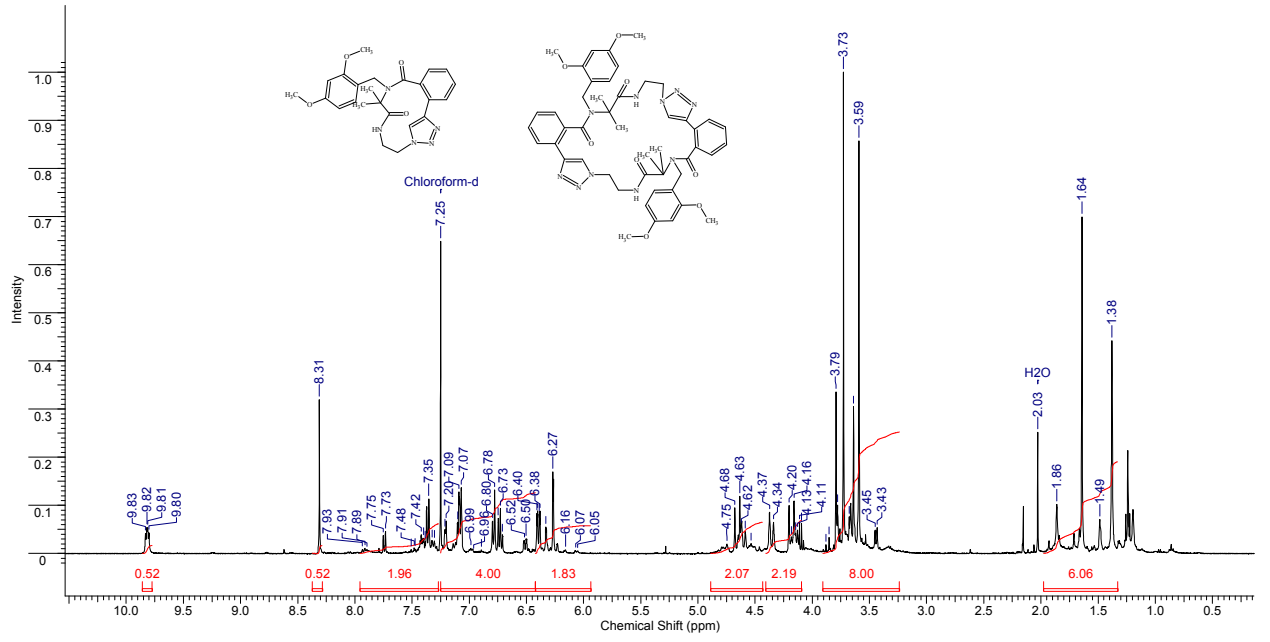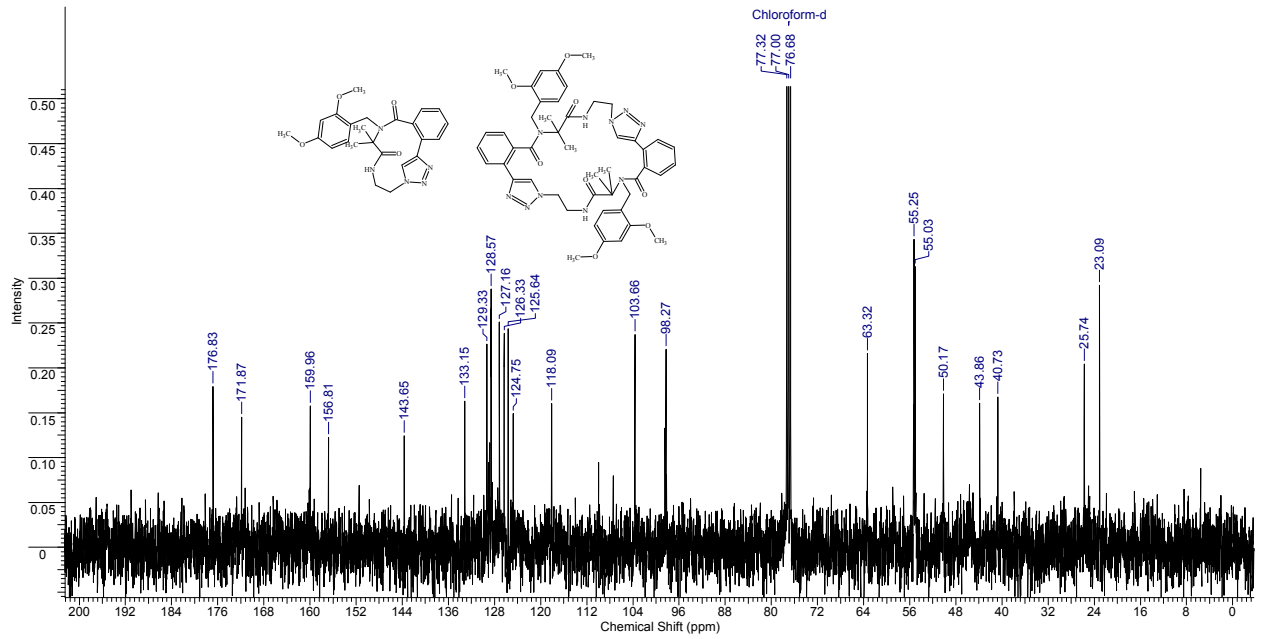



# 4o (several conformers)

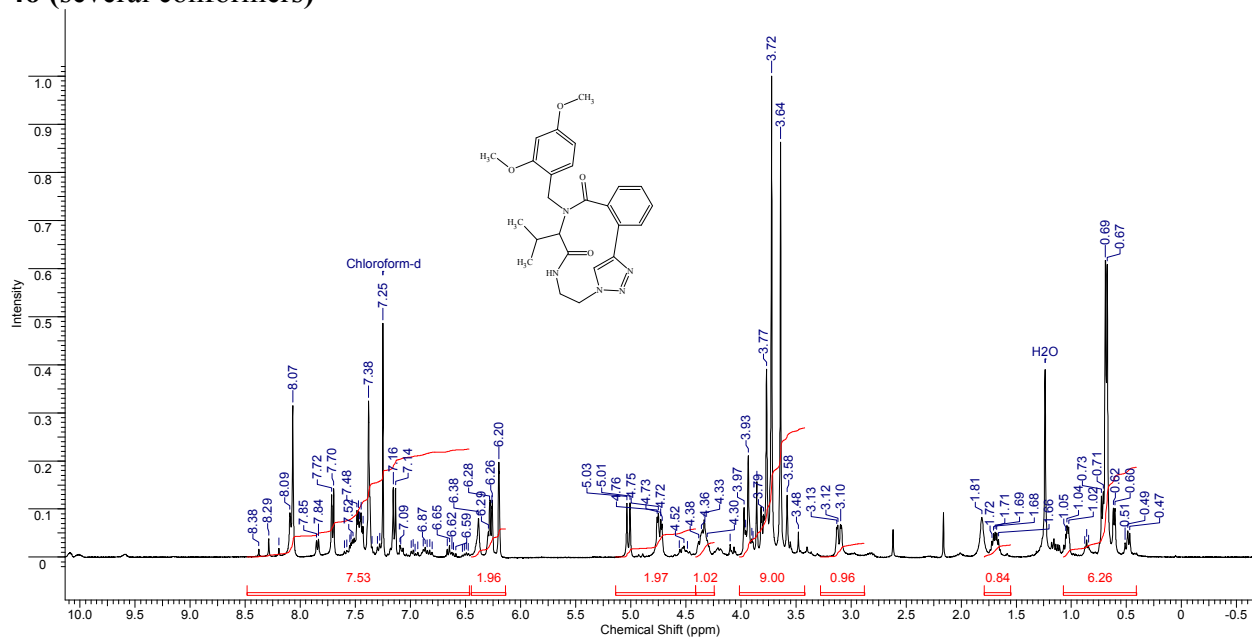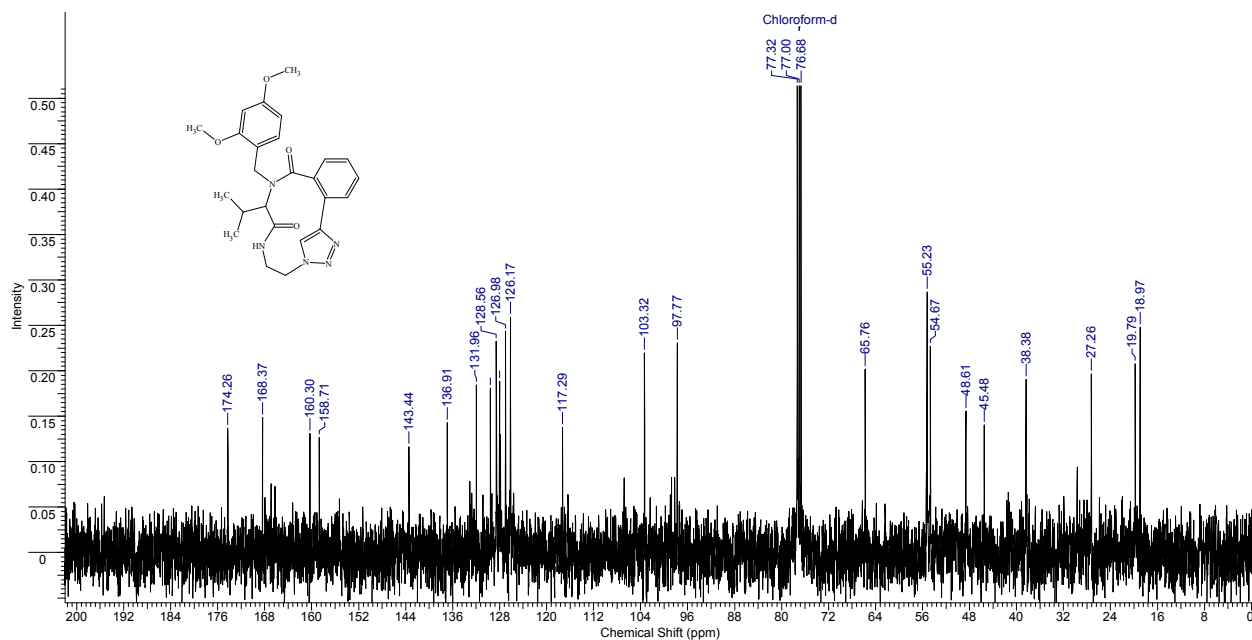



4q

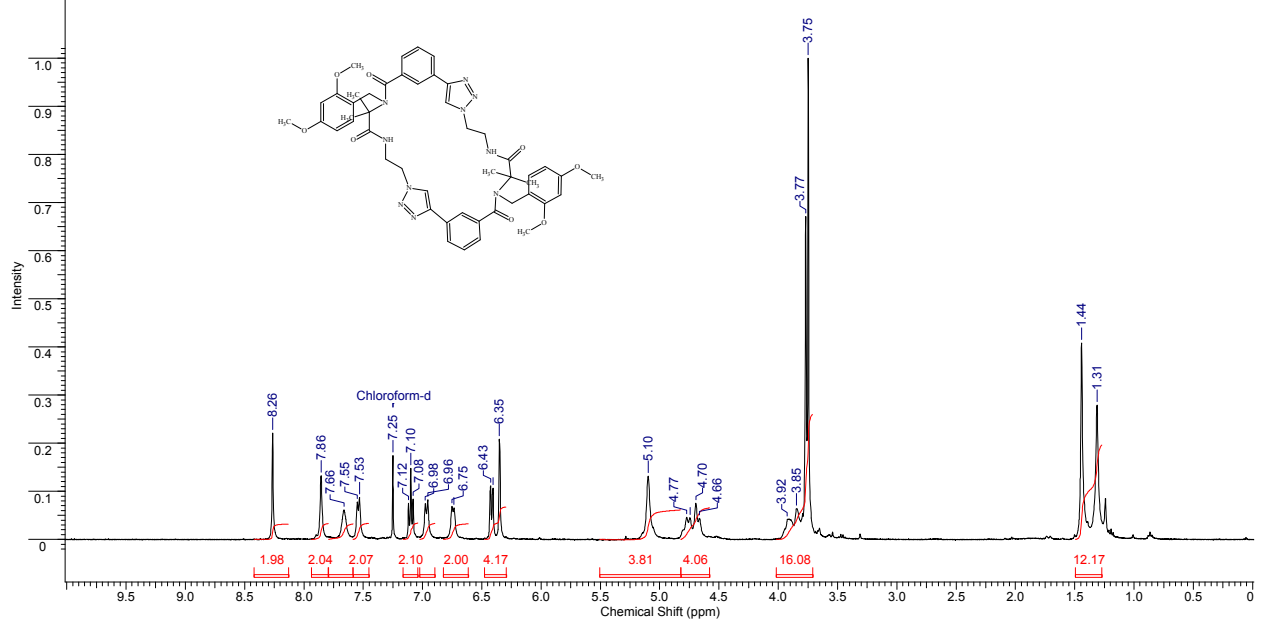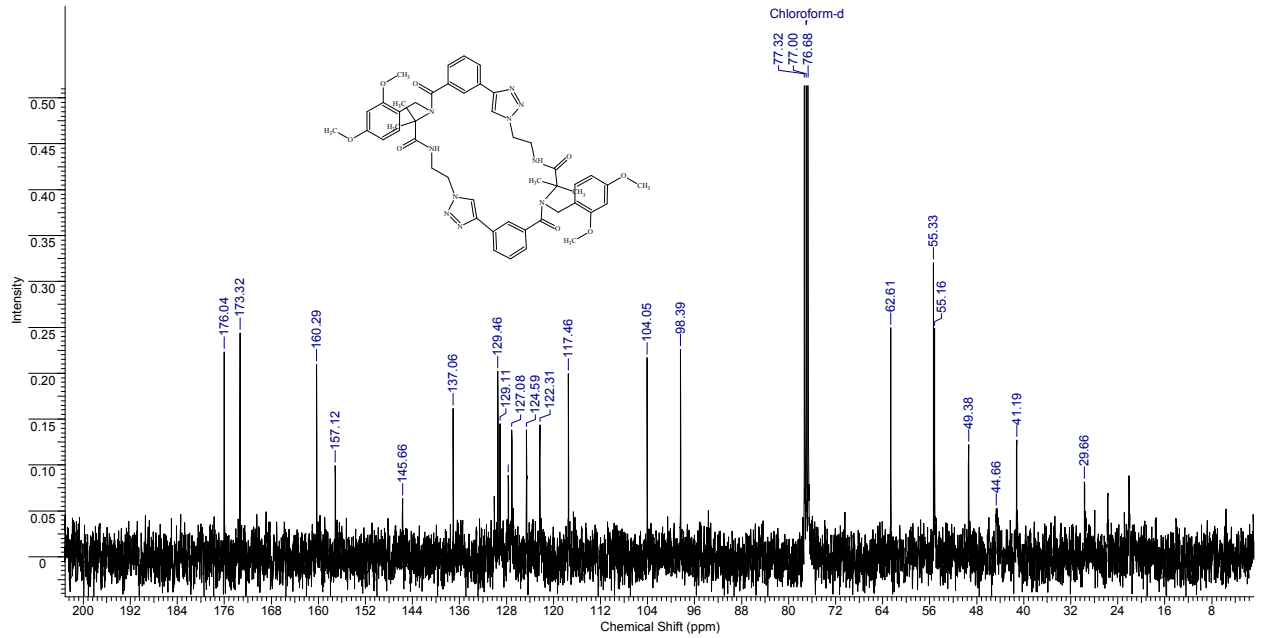

### 4r (two conformers or diastereoisomer in ratio 2:1)

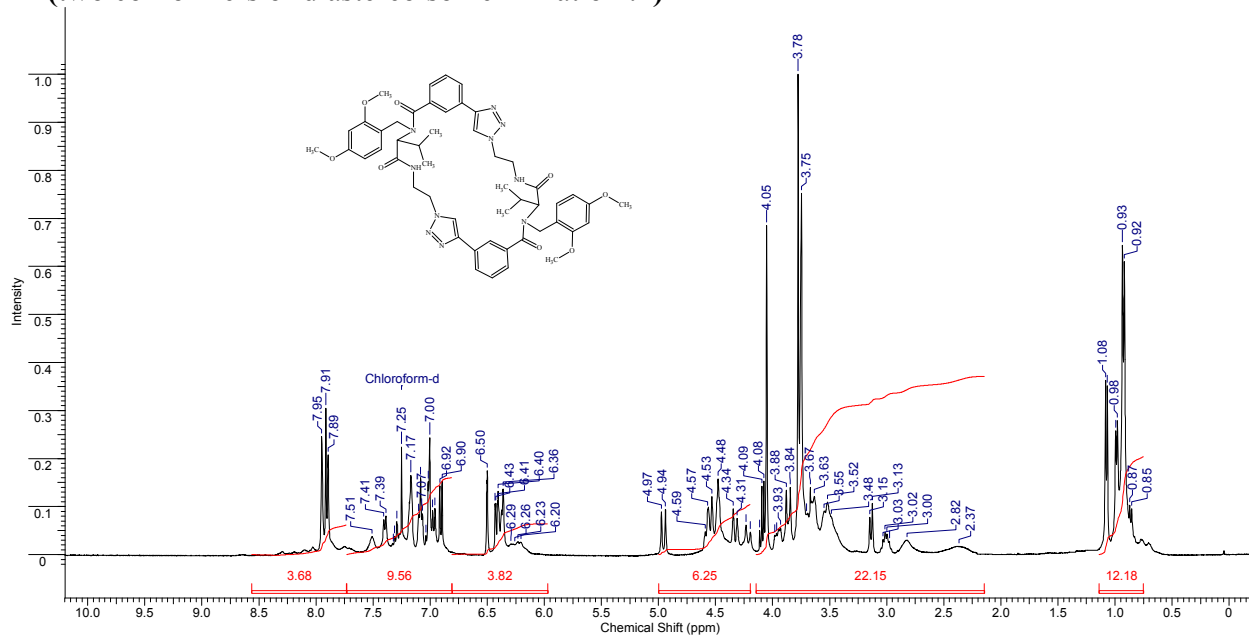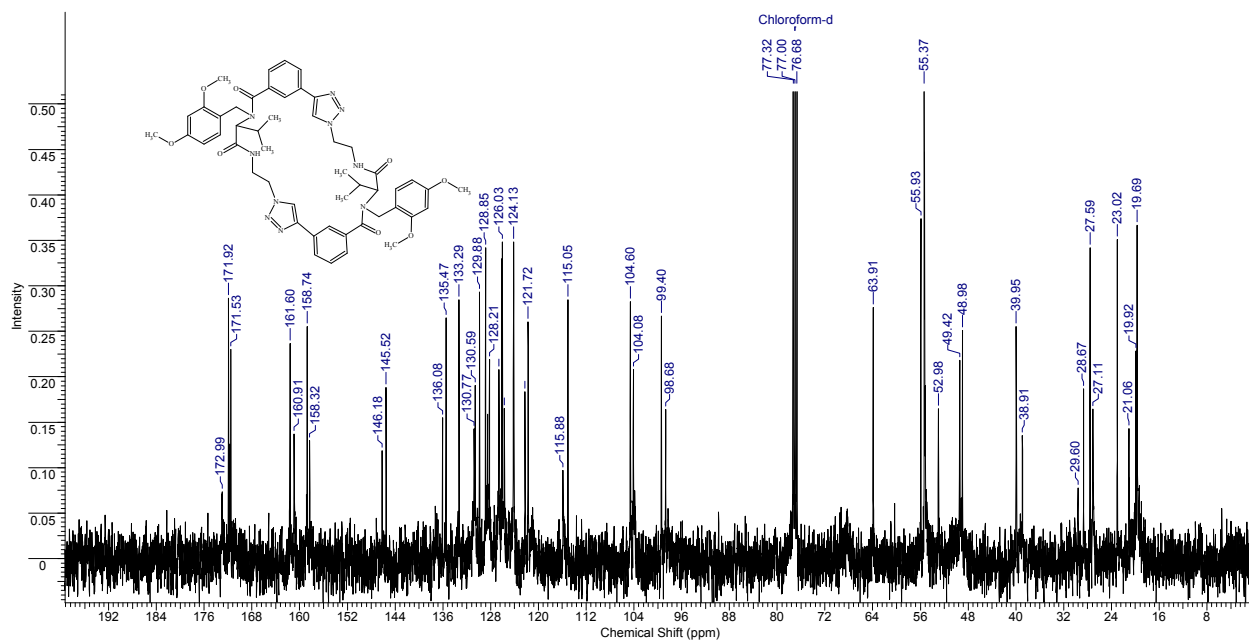



4u

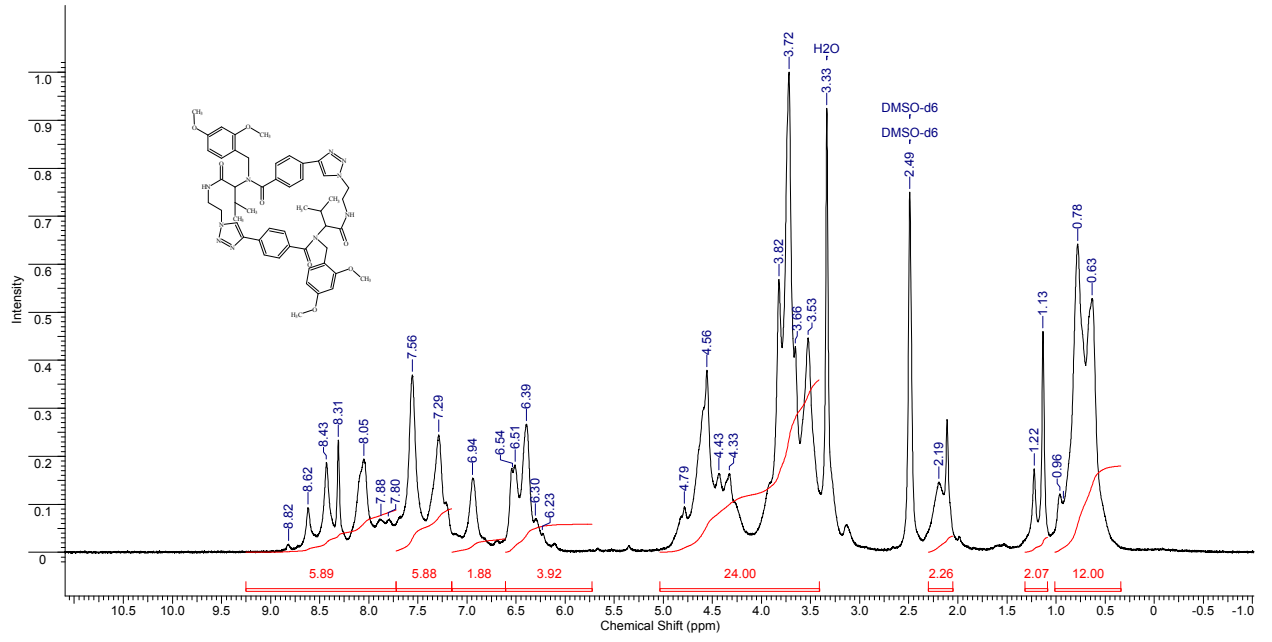

### 50 (the mixture of conformers)

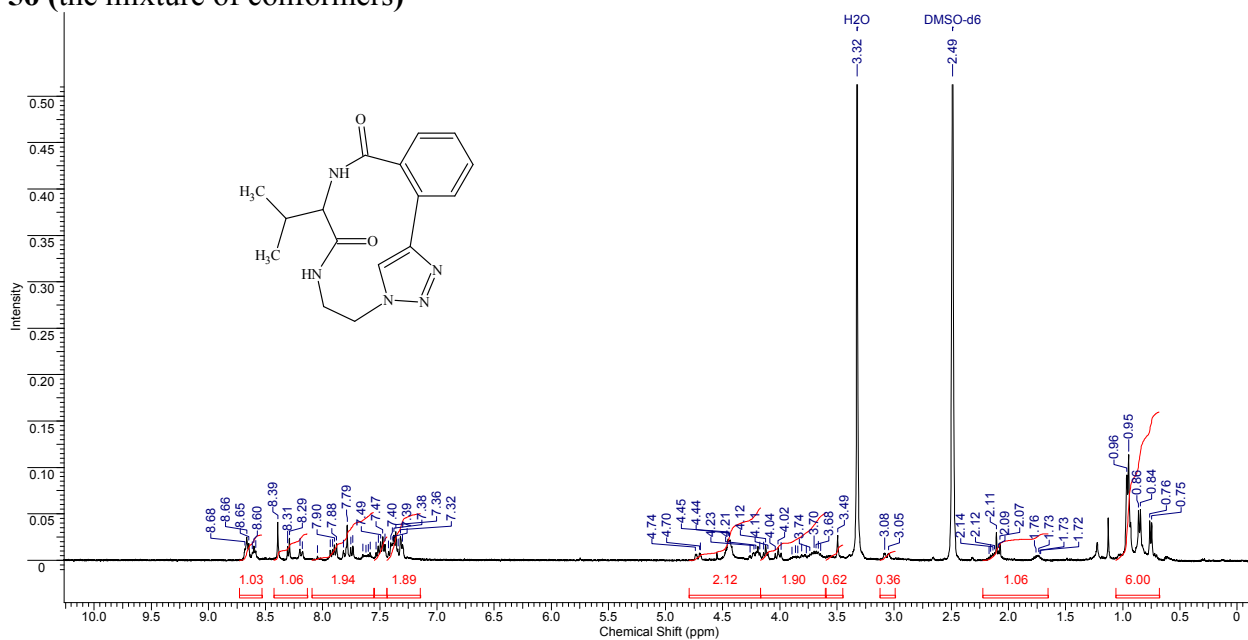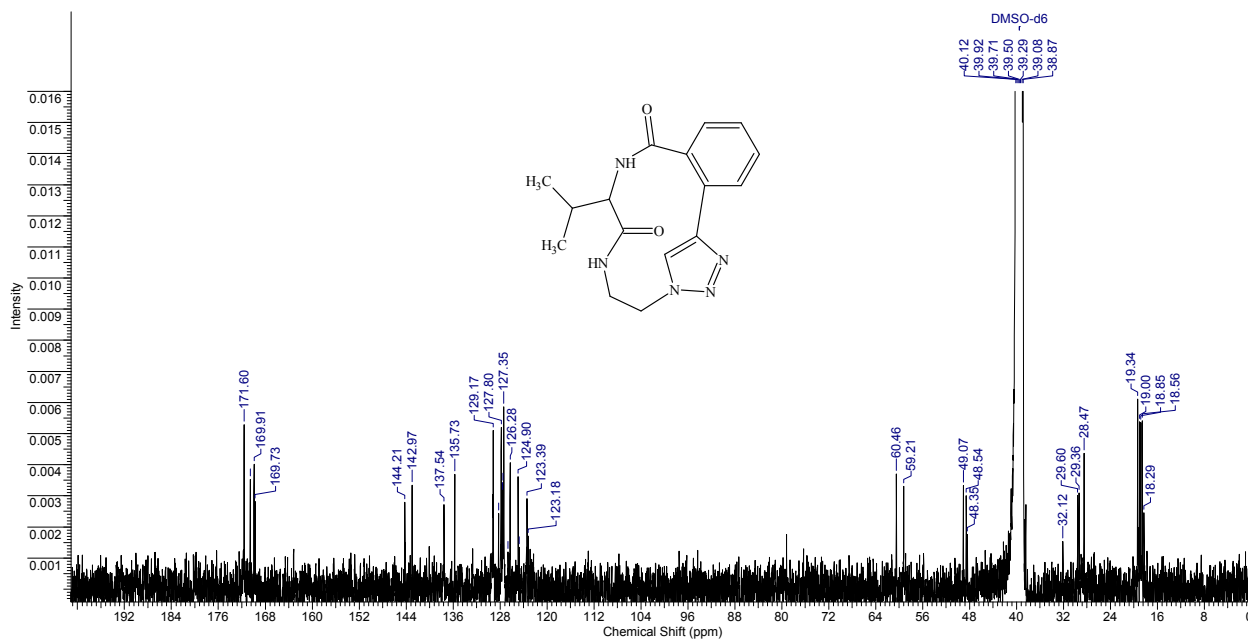

**5r** (several conformers or diastereomers)

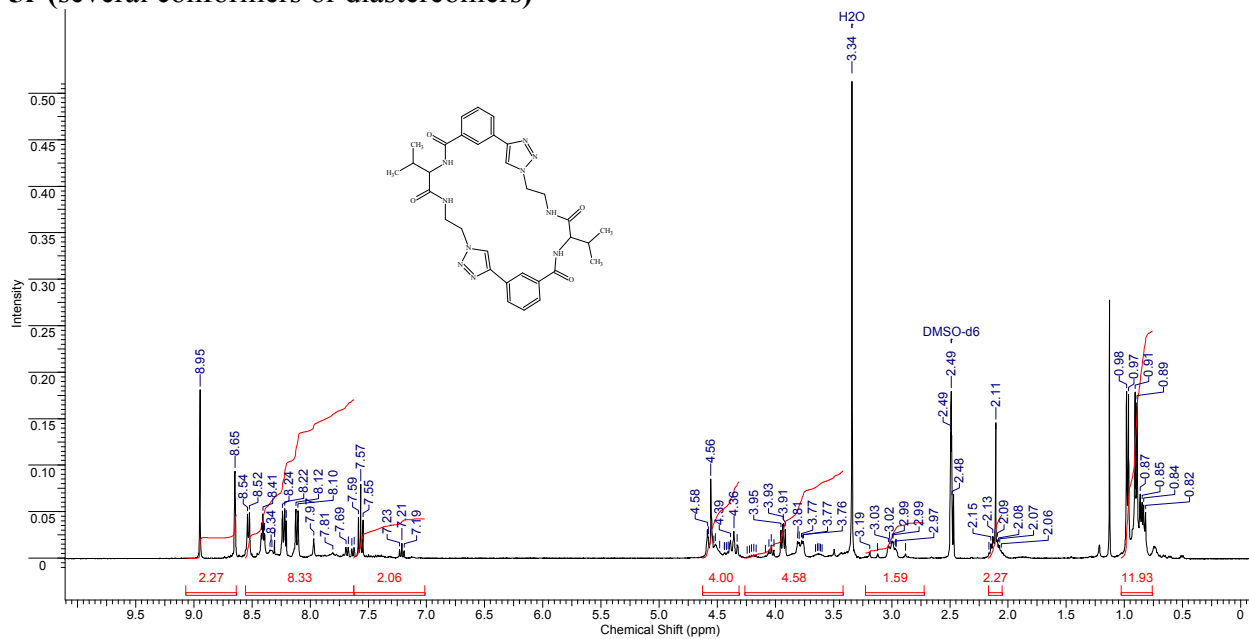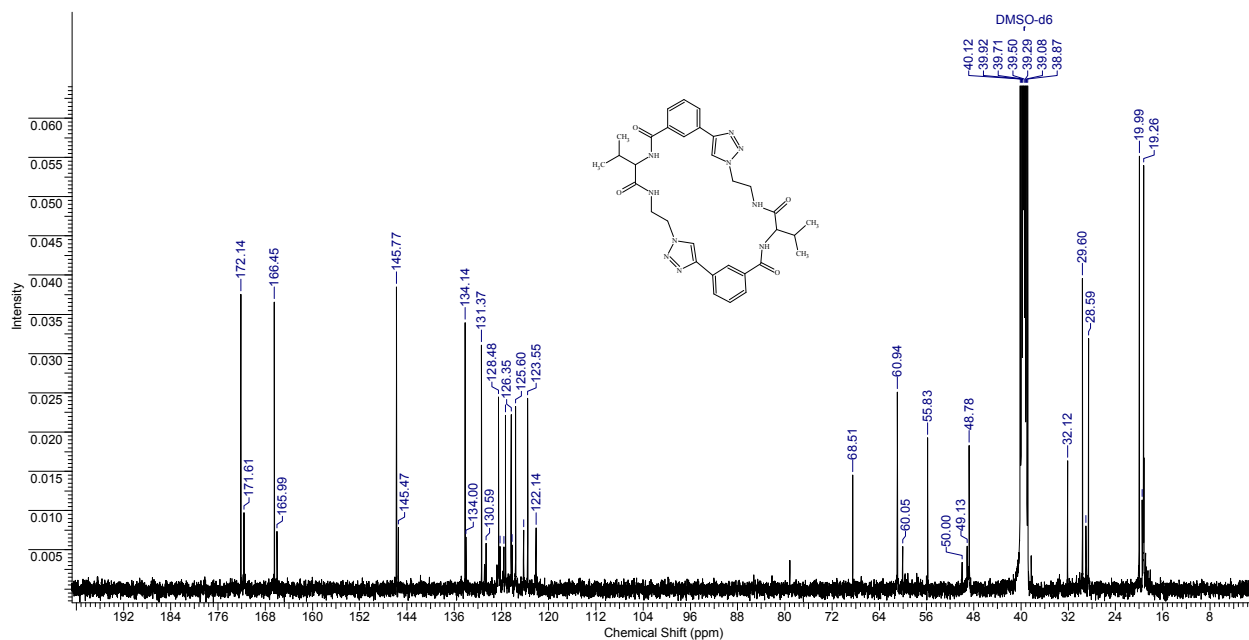



5u

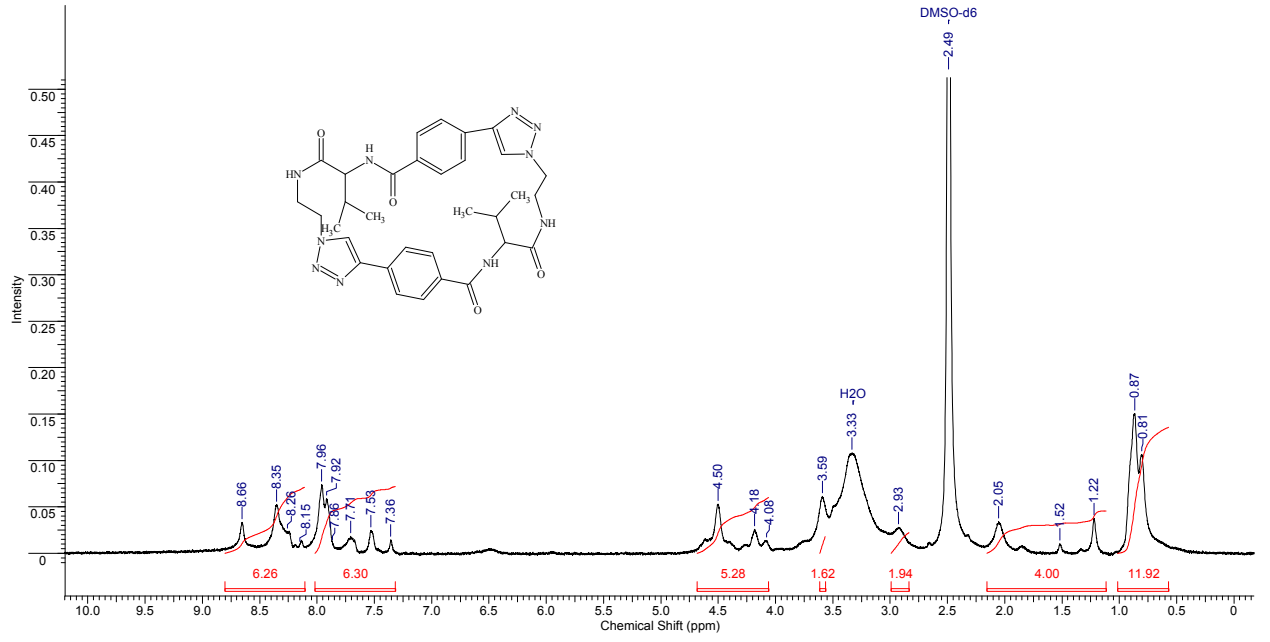

5i

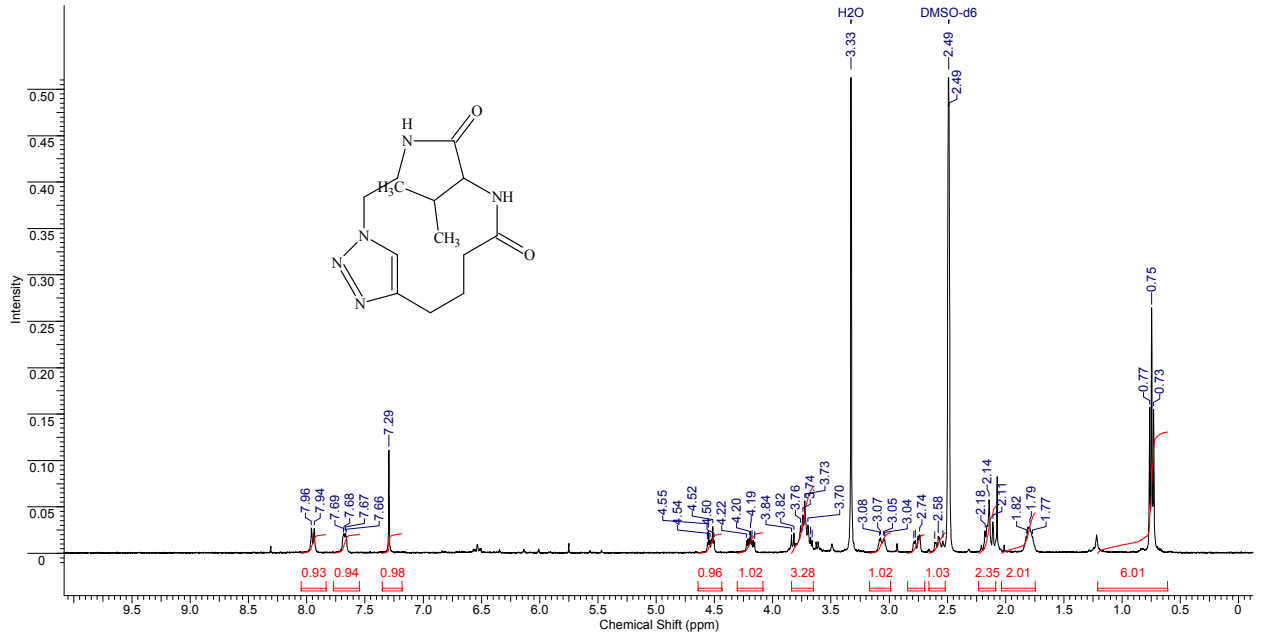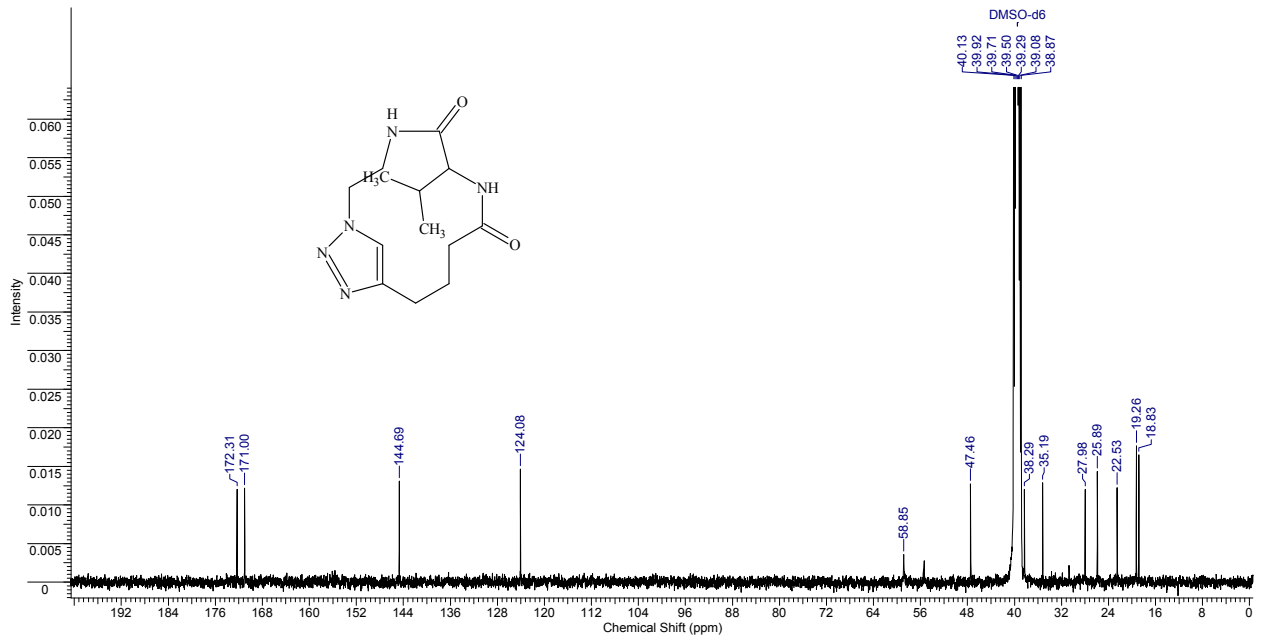

5q

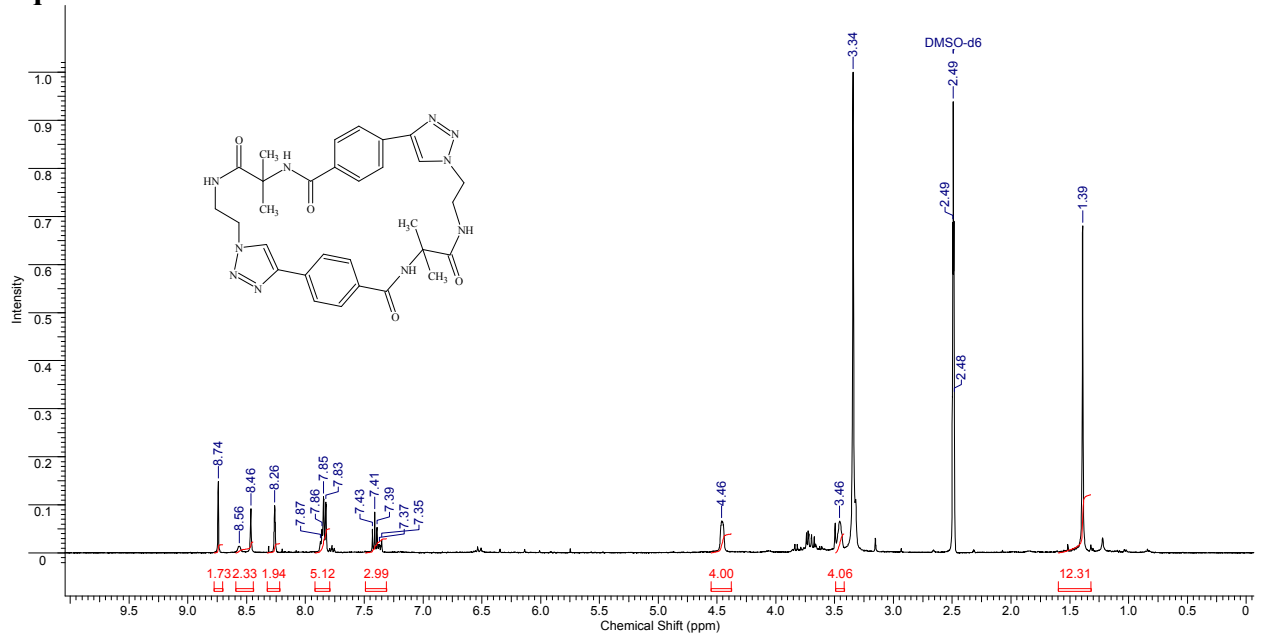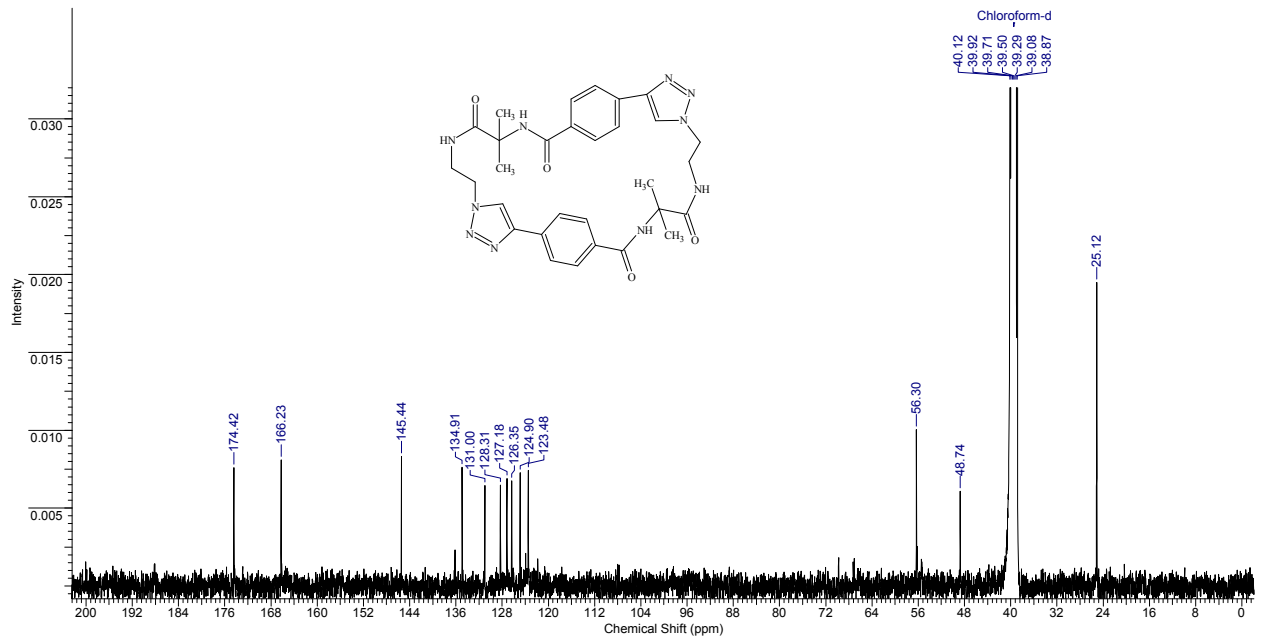

6i

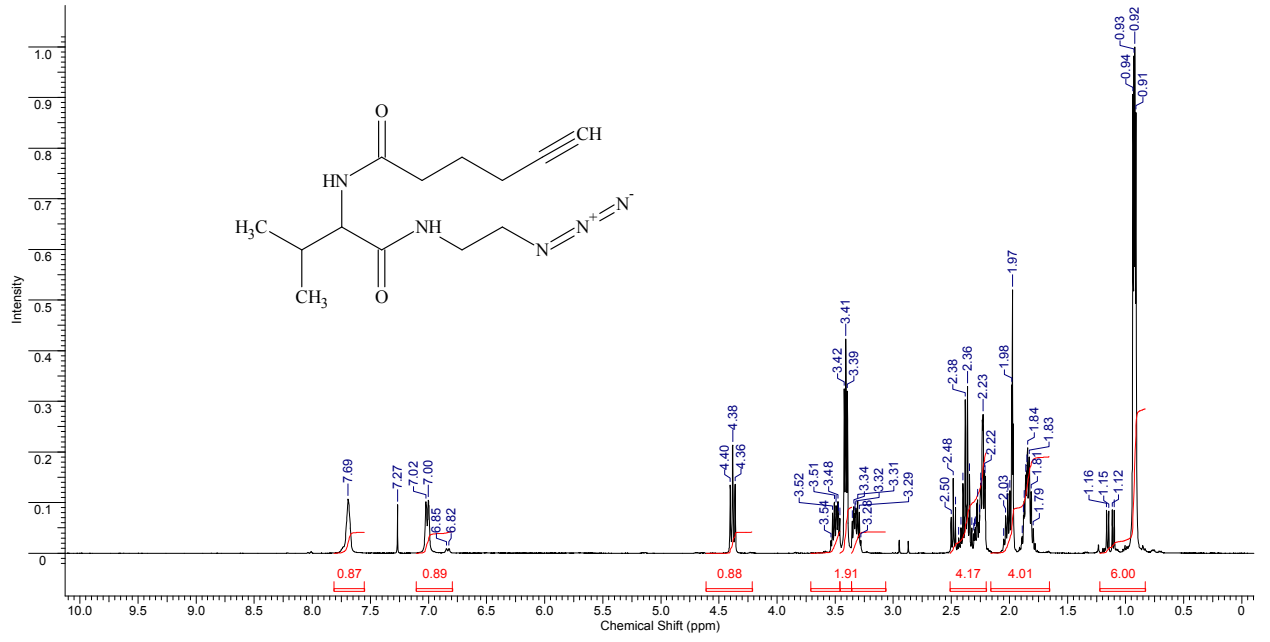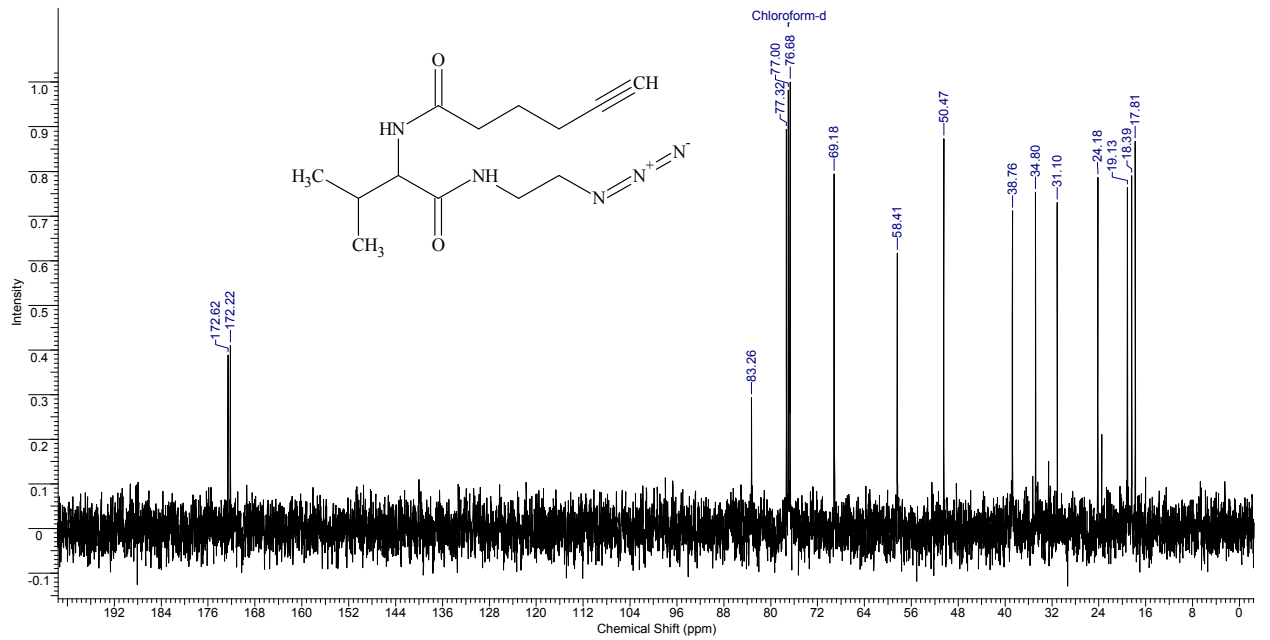

60

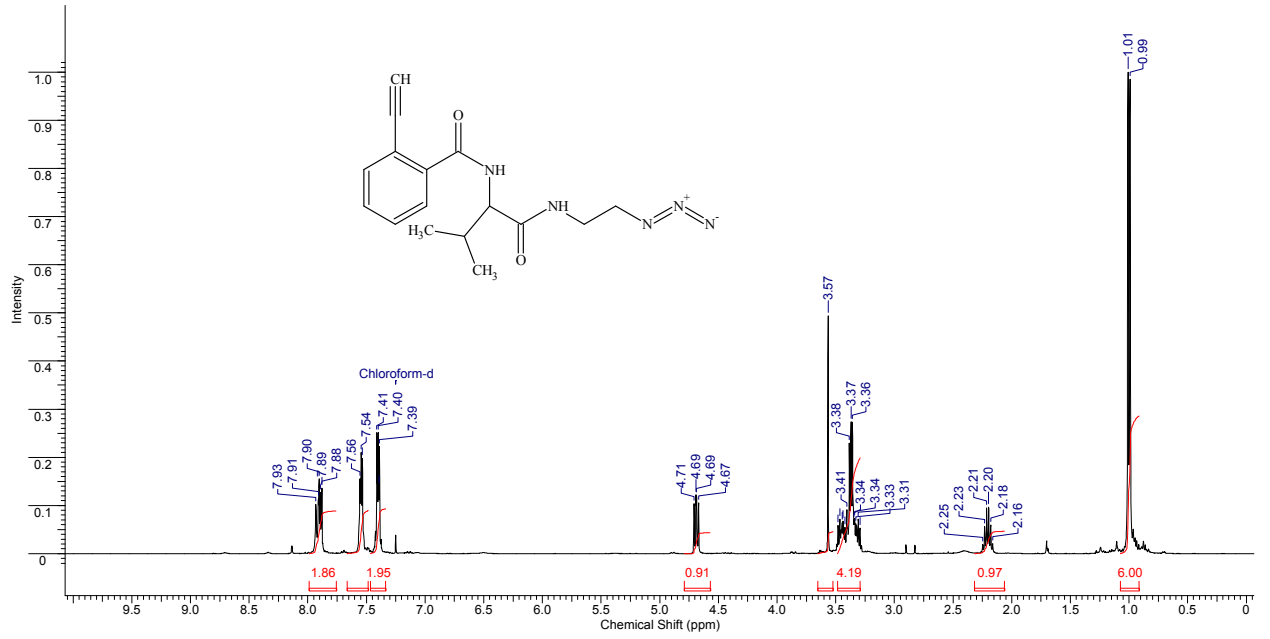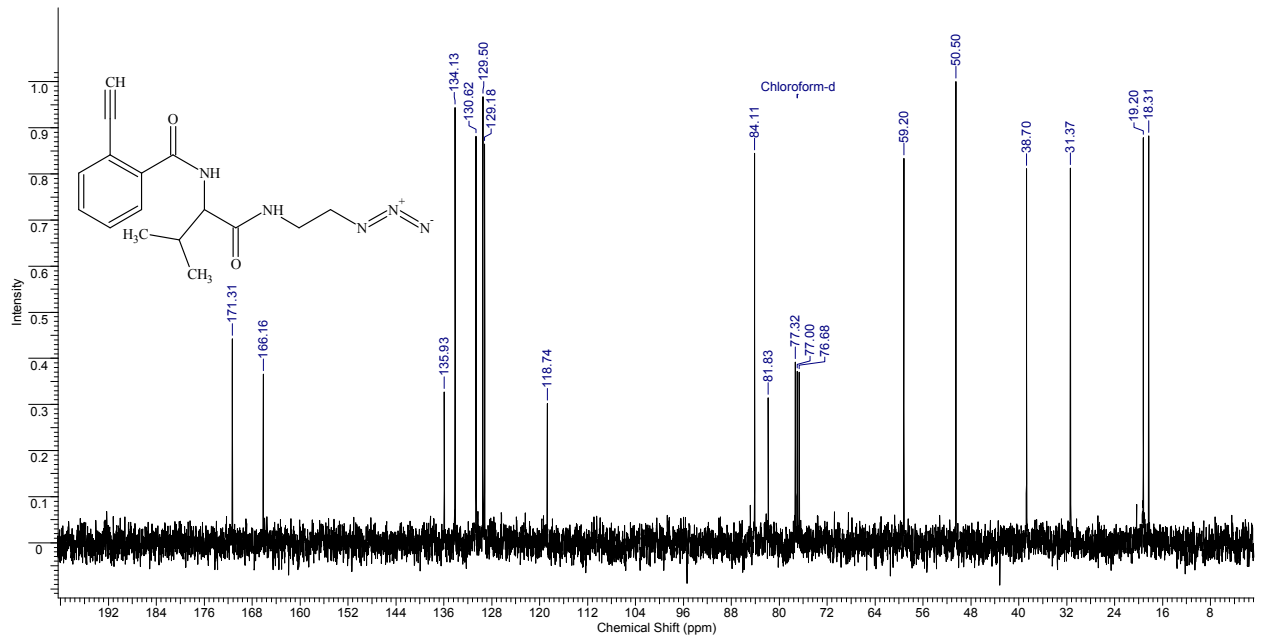

6r

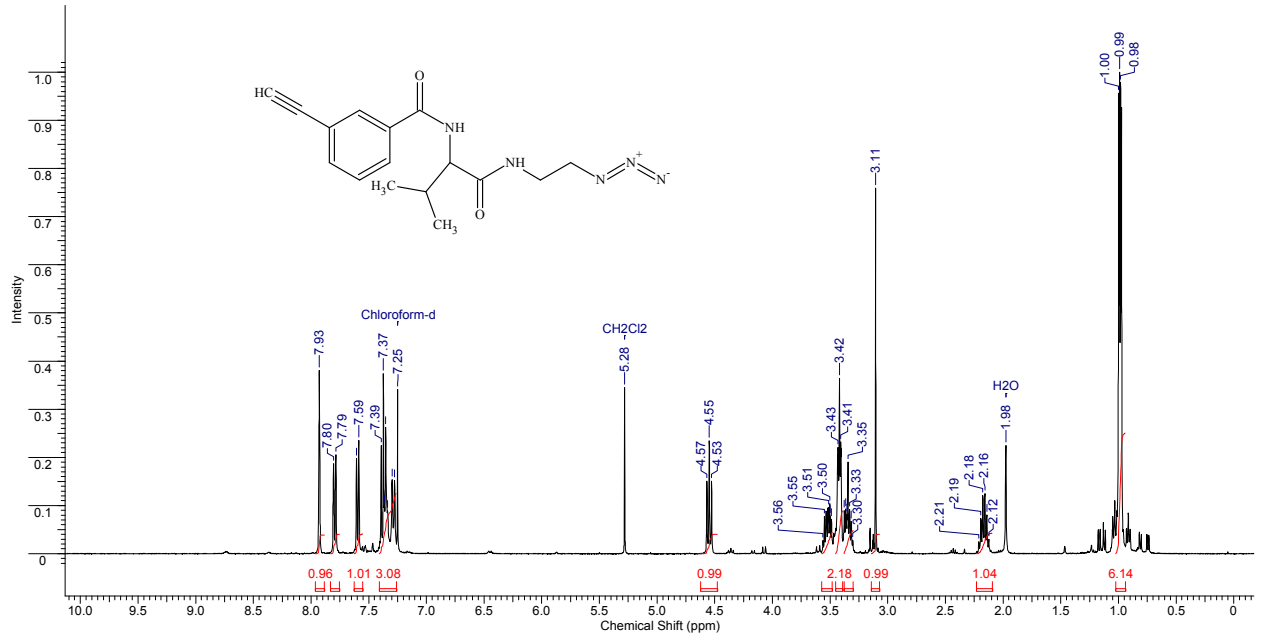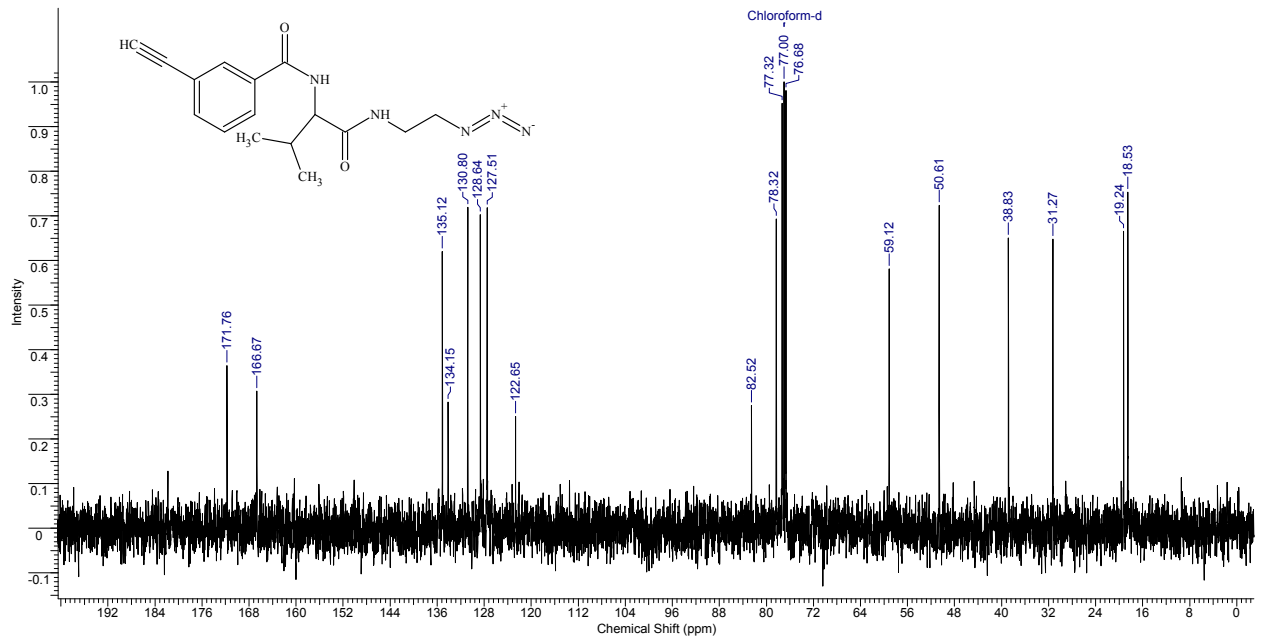

6u

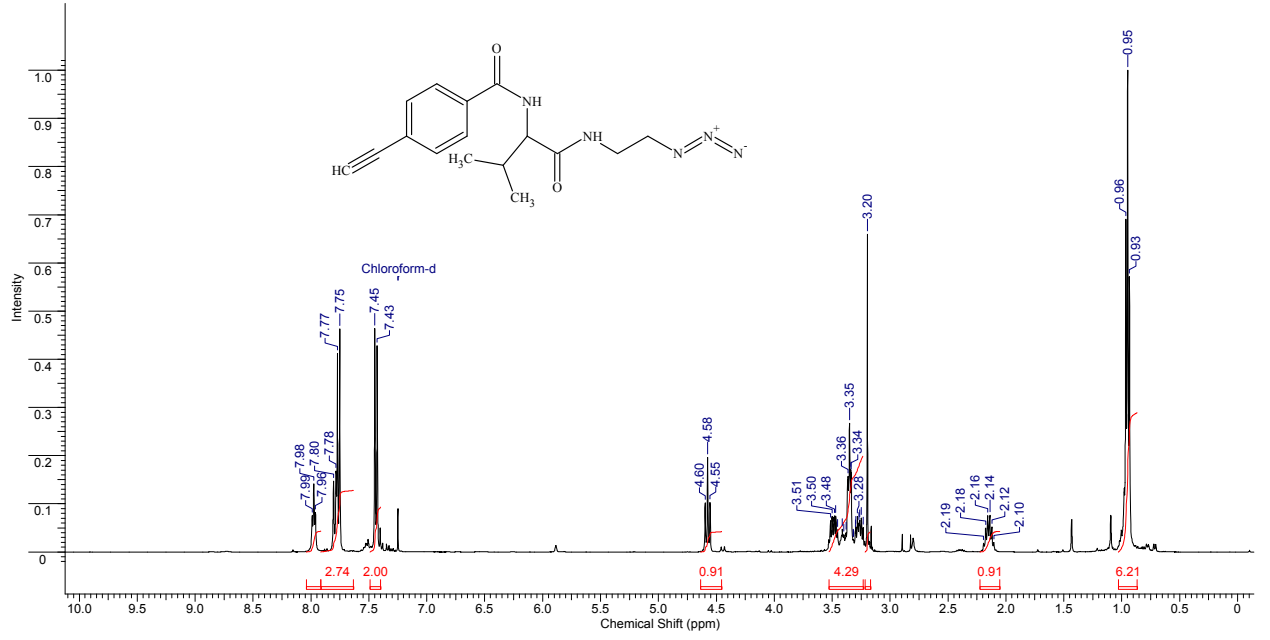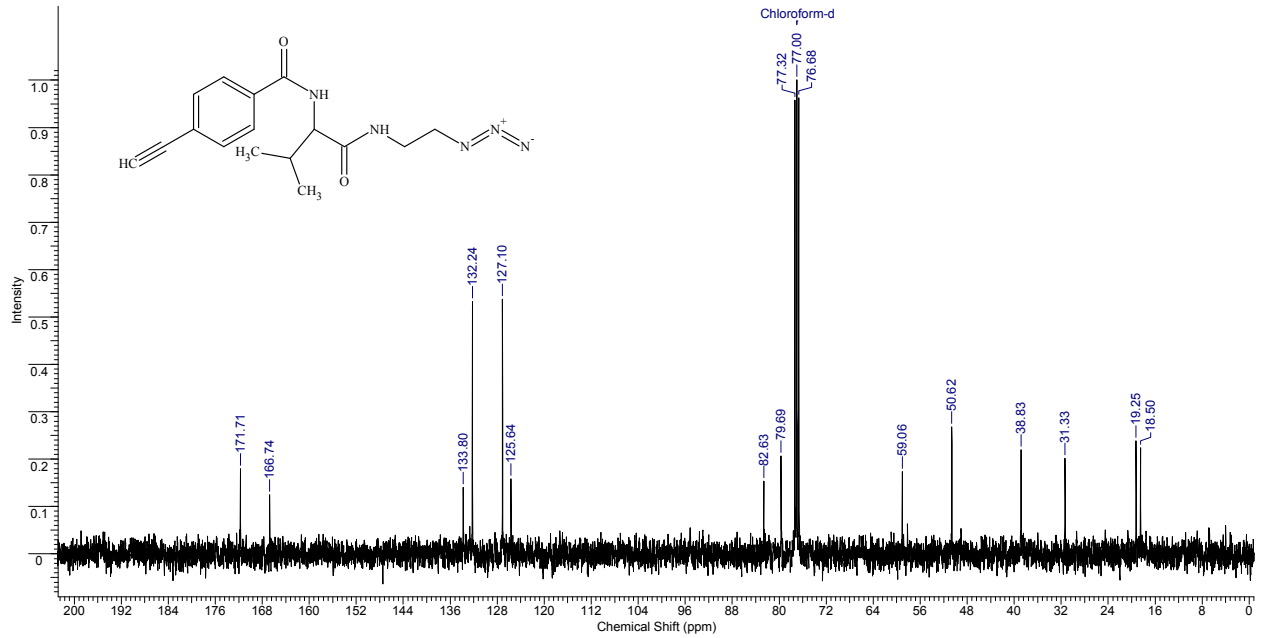

Supplement: c9ob00229d1.pdf [file c9ob00229d1.pdf]
